# Supplementary material
Source: HighWire-hosted journal article supplement (https://jmg.bmj.com/content/58/6/427)
Supplement: inline-supplementary-material-2 [file inline-supplementary-material-2.xlsx]

## Sheet: Table S1
Supplementary Table 1. Primers and PCR conditions utilized in this study.
		Forward (5′ → 3′)	Reverse (5′ → 3′)	Sequence primer	AT	CN
<Pyrosequencing analysis>
	PLAGL1:alt-TSS-DMR	GGGGTAGTYGTGTTTATAGTTTAG	biotin-CCCAAACACCTACCCTAC	GGGTAGTYGTGTTTATAGTTTAGT	55	45
	PEG10:TSS-DMR	AGAAATTTGATTGYGTTTTGAGGAGAAT	biotin-ACCTTTAAAACTTAATTTCCCCATTTAT	AGTTTGGYGAAAGGTT	55	45
	MEST:alt-TSS-DMR	GTGTGGTTGGYGGTTTTGGGATTA	biotin-ACACCCCCTCCTCAAATA	TGTTTTTGGGYGAAAATTTTAT	55	45
	H19/IGF2:IG-DMR	TTTGGGAGAGTTTGTGAGG	biotin-CCCCAAACCRATTCCCATCCAATTA	GRTAATATGYGGTTTTTAGATAGG	56	45
	KCNQ1OT1:TSS-DMR	GGATTTAGAATTAYGATGYGGATTTTA	biotin-TCCCATCTACACCTTATAAACA	TTTTGAATTATTATGAGAATTATAG	55	45
	MEG3/DLK1:IG-DMR	ATTTGGTATTTGTAGTTTTATGTTAAGATG	biotin-AATCAAAACAACTCAAATCCTTTATAAC	AATTGGGTTTGTTAGTAG	54	45
	MEG3:TSS-DMR	TTGTGTTTGAATTTATTTTGTTT	biotin-CCCCAAATTCTATAACAAATTACTCT	GTGTTTGAATTTATTTTGTTT	54	45
	SNURF:TSS-DMR	GTTATGGTAGTGGATTAGGGGGATGA	biotin-CCTTCCCCCTACCTCCCA	ATAGTGGTGGGGGTT	54	45
	GNAS A/B:TSS-DMR	GGGATATTTGAGATTTTGAAAGAA	biotin-AATACAAAACCTCCCCTACT	GTTATTTTTTTTATTTGGGAGGA	52	45
	ZNF597:TSS-DMR	GAAGAAGGATAGAAAGAAGATTGGGAGAT	biotin-CCCRCCCTCTCAATCACCTTACTC	AAAGAAGATTGGGAGATA	52	45
	ZNF597:3′ DMR	GGATATGGTTAGGTATATGGTTAAATTT	biotin-TCAAAAAAATCCTAAATCTCCAACTTAAC	GGGTATYGGAAGTGGT	52	45
<Microsatellite marker analysis>
	D16S521	GAGCGAGACTCCGTCTAAA	CAGCAGCCTCAGGGTT		56	35
	D16S3027	ATATTTGGCATCTGGGG	CCAGCATGAGTTGCTTT		52	35
	D16S418	TGTNAGGTATGAGACACTGC	CACCTTCTTGCCTTTCATTC		56	35
	D16S3102	CATGGGGACTCTGGCTAAC	ATCGTGTAATGACTGCCACAA		56	35
	D16S3103	GCTTTGAGTCTCCACATCTATGA	GGCCAGCAGGTCTTCCTA		56	35
	D16S403	GTTTTCTCCCTGGGACATTT	TATTCATTTGTGTGGGCATG		56	35
	D16S3100	CTTTTGCCTGGATGCTG	TTAATGAAGTGTAACACATATGCAC		56	35
	D16S3136	ATTGCCCTCAAGAACAGC	GTGCTATGCCATCCCAG		56	35
	D16S3034	TAATCTAGTTAAAGATGCAACTGCC	GCTCAGAAGTTTTGATGCC		56	35
	D16S514	CTATCCACTCACTTTCCAGG	TCCCACTGATCATCTTCTC		56	35
	D16S3066	AGTCAGGACACGATGGTTTG	CCCAGTTCCAATGGCAC		56	35
	D16S3049	GCAATGAAGGCAACAAAGT	TTAAAAGACCTGGGGGAAT		52	35
	D16S3091	GGGAGATAGCCTTAAACTTTCTTAC	TGTTGCTAATAACACTAGGCCA		56	35
<qRT-PCR>
	ZNF597	CTTTGTCACGAAGTCCCTGTG	AGAGTCACGCACTCCTCTTGA		60	40
	NAA60 isoform 1	AGACACCGGAACTCGAAAGA	TCTCTGGAGCTCTTCTCCCAAC		60	40
<RT-PCR>
	ZNF597 for rs2270494	CTTTGTCACGAAGTCCCTGTG	AGAGTCACGCACTCCTCTTGA		60	40
	NAA60 isoform 1 for rs1137454	AGCAACCATTTCCGCTTCC	CTAGTGCAGAGCCCAGGGCTGGATG		58	40
	NAA60 isoform 2 for rs1137454	GGCTCCCCCACGAGGTGTGAATG	CTAGTGCAGAGCCCAGGGCTGGATG		55	40
<Sanger-sequencing for gDNA>
	rs2270494	CCTTTTATCCCGTGCATCTG	ATTGCCTTACCCATCAAAGC		55	35
	rs1137454	GCCATTTACCTGCATGTCCT	ACTGGCTCTGCCACCTTAT		55	35
	ZNF597:TSS-DMR seq1	CCTGGCACTGGAATAAGGAA	GCCAGAGCAAGGTGATTGAG		60	35
	ZNF597:TSS-DMR seq2	CGCTCAAGACACAAAGGACA	TAAAAACCTACGCCGACTGC		60	35
	ZNF597:TSS-DMR seq3	GCTTTCTGCAGCTCCTGTCA	AGAGGCTGAGGCGTAAGGAT		60	35
	ZNF597:3′ DMR seq1	CCTCCGCAAACACTCTTACC	CTGTCTTCACGGAGCAGCTA		60	35
	ZNF597:3′ DMR seq2	CCAAGCTTTAAGTGGCAACC	GATGGCAATGAAGTGAACTTTT		60	35
DMR, differentially methylated region; AT, annealing temperature (°C); CN, cycle numbers; Y, C or T (pyrimidine); R, A or G (purine); qRT-PCR, quantitative reverse-transcription polymerase chain reaction;
gDNA, genomic DNA
