# Supplementary material
Source: HighWire-hosted journal article supplement (https://jmg.bmj.com/content/58/6/427)
Supplement: inline-supplementary-material-4 [file inline-supplementary-material-4.pdf]

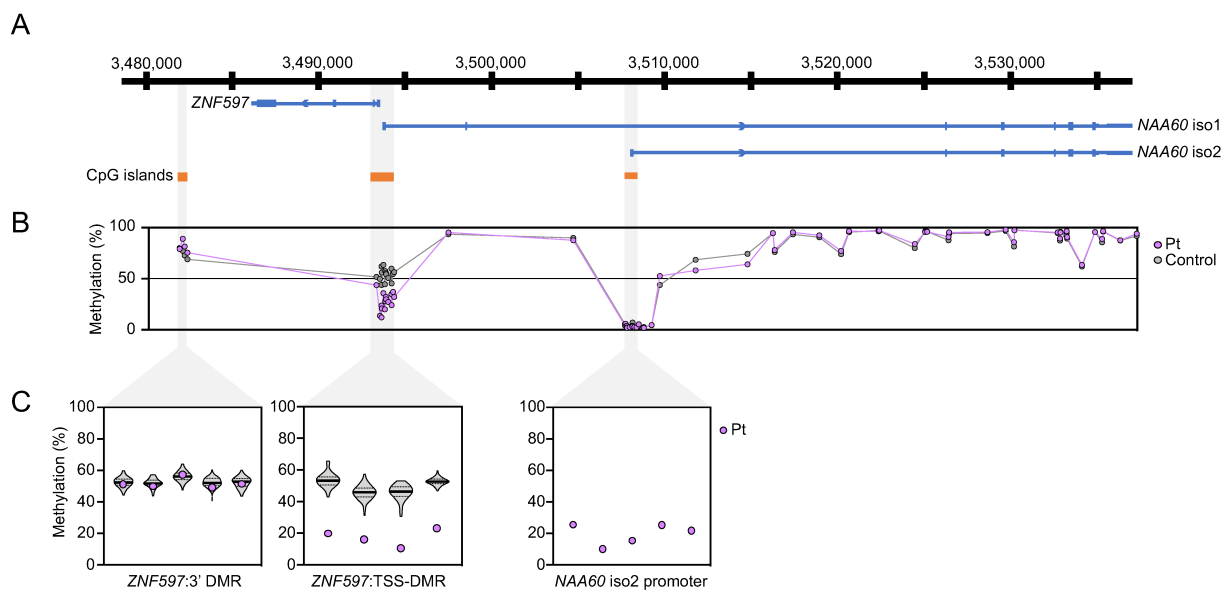

**Supplementary Figure 2.** Methylation analysis of the *ZNF597/NAA60* imprinted domain in buccal cell samples. **(A)** Schematic representation of the *ZNF597/NAA60* imprinted domain on chromosome 16, showing the location of the CpG islands. **(B)** Methylation levels of 73 CpG sites across the domain by the Infinium MethylationEPIC BeadChip analysis for the buccal cell genomic DNA from the patient (purple dots) and 20 control subjects (grey dots; average values are shown). **(C)** Pyrosequencing confirmation of the methylation levels for the *ZNF597*:3' DMR, *ZNF597*:TSS-DMR, and *NAA60* isoform 2 promoter. Purple dots show methylation levels of buccal cell DNA of the patient. Violin plots in the *ZNF597*:3' DMR and *ZNF597*:TSS-DMR show the distribution of methylation for 69 control buccal cell samples, including the medians (bold lines) and interquartile ranges (dotted lines).
