# Supplementary material
Source: HighWire-hosted journal article supplement (https://jmg.bmj.com/content/58/6/427)
Supplement: inline-supplementary-material-6 [file inline-supplementary-material-6.pdf]

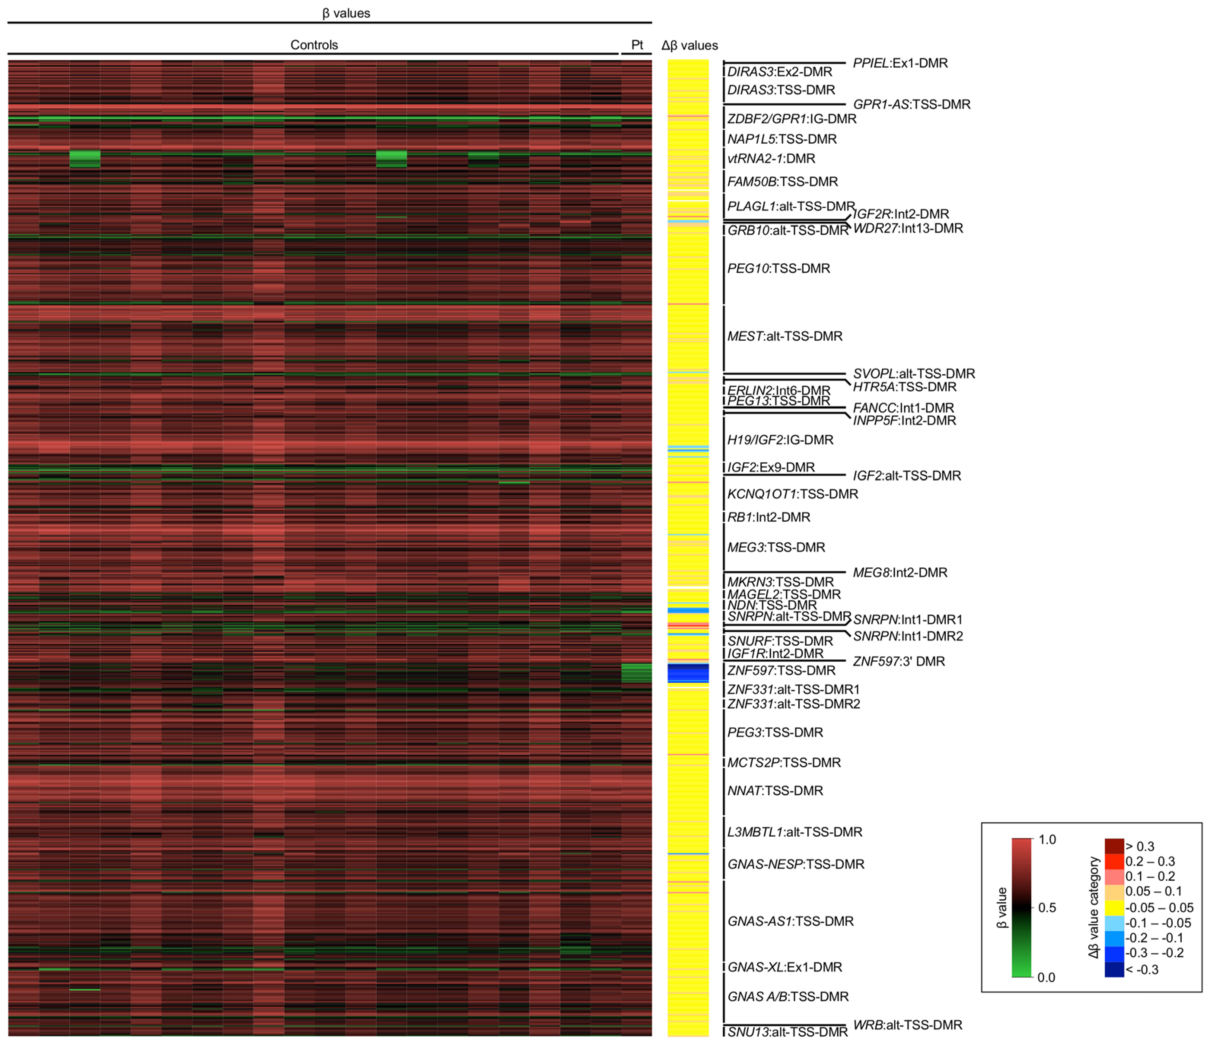

**Supplementary Figure 3.** Array-based methylation analysis by Infinium MethylationEPIC BeadChip for buccal cell samples. The left panel is a heatmap of absolute methylation ( $\beta$  values) for a total of 789 probes located within known imprinted differentially methylated regions in the buccal cell samples of the patient (the rightmost lane) and 20 controls (the other lanes). The nine categories of  $\Delta\beta$  values, obtained by the subtraction of the average  $\beta$  value of 20 control buccal cell samples from the  $\beta$  value of patient buccal cell sample, are also shown on the right of the heatmap.
