# Supplementary material
Source: HighWire-hosted journal article supplement (https://jmg.bmj.com/content/58/6/427)
Supplement: inline-supplementary-material-7 [file inline-supplementary-material-7.xlsx]

## Sheet: Table S3
Supplementary Table 3. Tabulation of the HumanMethylationEPIC probes and methylation levels (β values) of buccall cell DNA located within imprinted DMRs.
Examined CpGs					Patient			Controls (n=20)
CHR	MAPINFO	Probe ID	DMR		β	delta_beta		Average	SD	Average −3SD	Average +3SD
1	40024971	cg10243676	PPIEL:Ex1-DMR		0.613628	0.0371178		0.57651	0.0490848	0.429256	0.723765
1	40025232	cg11704876	PPIEL:Ex1-DMR		0.601878	-0.0109361		0.612814	0.0511588	0.459338	0.76629
1	40025411	cg22862450	PPIEL:Ex1-DMR		0.772071	0.0471787		0.724893	0.0408942	0.60221	0.847575
1	40025415	cg15057250	PPIEL:Ex1-DMR		0.792143	0.0364656		0.755677	0.0390637	0.638486	0.872869
1	68512539	cg03641225	DIRAS3:Ex2-DMR		0.482363	0.00579014		0.476573	0.048552	0.330917	0.622229
1	68512650	cg24871743	DIRAS3:Ex2-DMR		0.77118	-0.0266136		0.797794	0.0421741	0.671271	0.924316
1	68512777	cg22901840	DIRAS3:Ex2-DMR		0.631835	0.0179762		0.613859	0.0485168	0.468309	0.75941
1	68512807	cg20149168	DIRAS3:Ex2-DMR		0.761027	0.0197793		0.741247	0.0392093	0.62362	0.858875
1	68512845	cg13697378	DIRAS3:Ex2-DMR		0.586225	-0.006266		0.592491	0.0308429	0.499962	0.68502
1	68512928	cg00448707	DIRAS3:Ex2-DMR		0.752801	0.0103613		0.74244	0.0374619	0.630054	0.854826
1	68512971	cg09118625	DIRAS3:Ex2-DMR		0.682677	0.00297516		0.679702	0.0544336	0.516401	0.843002
1	68513063	cg21808053	DIRAS3:Ex2-DMR		0.563825	0.0121142		0.55171	0.0387002	0.43561	0.667811
1	68515788	cg02317907	DIRAS3:TSS-DMR		0.877483	0.0462387		0.831244	0.0268269	0.750763	0.911725
1	68515872	cg17943391	DIRAS3:TSS-DMR		0.58826	0.0478963		0.540364	0.0366856	0.430307	0.650421
1	68515977	cg19114595	DIRAS3:TSS-DMR		0.786513	0.063188		0.723325	0.0371648	0.611831	0.834819
1	68516080	cg12070746	DIRAS3:TSS-DMR		0.596745	0.0305004		0.566245	0.0449372	0.431433	0.701057
1	68516101	cg16314899	DIRAS3:TSS-DMR		0.749831	0.0322601		0.717571	0.0361905	0.608999	0.826142
1	68516138	cg25755905	DIRAS3:TSS-DMR		0.611857	0.0368016		0.575055	0.0422551	0.44829	0.701821
1	68516272	cg22500004	DIRAS3:TSS-DMR		0.736203	0.0286527		0.707551	0.0534732	0.547131	0.86797
1	68516279	cg05949203	DIRAS3:TSS-DMR		0.728732	0.0231579		0.705574	0.0600043	0.525561	0.885587
1	68516374	cg19694923	DIRAS3:TSS-DMR		0.618664	0.0150985		0.603566	0.0462914	0.464692	0.74244
1	68516453	cg05392265	DIRAS3:TSS-DMR		0.652189	0.0196024		0.632587	0.0473703	0.490476	0.774698
1	68516463	cg06191076	DIRAS3:TSS-DMR		0.698709	0.0460413		0.652668	0.0485684	0.506963	0.798373
1	68516465	cg16148270	DIRAS3:TSS-DMR		0.817593	0.0591887		0.758404	0.0313132	0.664464	0.852343
1	68516518	cg13208159	DIRAS3:TSS-DMR		0.631764	0.046263		0.585501	0.0481922	0.440924	0.730077
1	68516713	cg13099417	DIRAS3:TSS-DMR		0.667657	0.0356073		0.63205	0.0432868	0.50219	0.76191
1	68517177	cg27545611	DIRAS3:TSS-DMR		0.652155	-0.00880788		0.660963	0.0212496	0.597214	0.724711
1	68517205	cg16148134	DIRAS3:TSS-DMR		0.573642	0.0201968		0.553446	0.0279915	0.469471	0.63742
1	68517255	cg13605615	DIRAS3:TSS-DMR		0.607006	0.0561409		0.550865	0.0452694	0.415057	0.686673
1	68517273	cg10038185	DIRAS3:TSS-DMR		0.58802	-0.00518208		0.593202	0.0469455	0.452365	0.734038
1	68517436	cg14230016	DIRAS3:TSS-DMR		0.679328	0.0419232		0.637405	0.0318695	0.541796	0.733013
1	68517454	cg01547550	DIRAS3:TSS-DMR		0.633436	0.0685239		0.564912	0.0245983	0.491117	0.638707
1	68517462	cg14059179	DIRAS3:TSS-DMR		0.492659	-0.0107579		0.503417	0.0190164	0.446368	0.560466
2	207068254	cg19696983	GPR1-AS:TSS-DMR		0.948302	-0.003033		0.951335	0.0113918	0.91716	0.985511
2	207068317	cg23239484	GPR1-AS:TSS-DMR		0.926542	-0.00294477		0.929486	0.00835141	0.904432	0.954541
2	207068409	cg13443116	GPR1-AS:TSS-DMR		0.97946	-0.00167933		0.981139	0.0029795	0.972201	0.990078
2	207114924	cg22719723	ZDBF2/GPR1:IG-DMR		0.732767	0.0368793		0.695887	0.0578196	0.522429	0.869346
2	207116070	cg25535070	ZDBF2/GPR1:IG-DMR		0.804777	0.0258452		0.778932	0.0252984	0.703036	0.854827
2	207116401	cg04359324	ZDBF2/GPR1:IG-DMR		0.652054	-0.00443886		0.656492	0.06149	0.472022	0.840963
2	207118253	cg20471298	ZDBF2/GPR1:IG-DMR		0.748212	0.0432174		0.704995	0.0518753	0.549369	0.860621
2	207118288	cg03428109	ZDBF2/GPR1:IG-DMR		0.744479	0.0111557		0.733323	0.0283777	0.64819	0.818456
2	207125019	cg15093040	ZDBF2/GPR1:IG-DMR		0.566911	0.073472		0.493439	0.0477243	0.350266	0.636612
2	207125060	cg17133012	ZDBF2/GPR1:IG-DMR		0.366317	0.114961		0.251356	0.0585707	0.0756438	0.427068
2	207125268	cg16353127	ZDBF2/GPR1:IG-DMR		0.0397265	0.0103654		0.0293611	0.00606908	0.0111539	0.0475684
2	207125465	cg04918871	ZDBF2/GPR1:IG-DMR		0.517358	0.076914		0.440444	0.05455	0.276794	0.604094
2	207125606	cg03141680	ZDBF2/GPR1:IG-DMR		0.438897	0.0689105		0.369987	0.0849626	0.115099	0.624875
2	207127226	cg25307915	ZDBF2/GPR1:IG-DMR		0.707678	0.0277485		0.679929	0.028785	0.593574	0.766284
2	207127364	cg19366042	ZDBF2/GPR1:IG-DMR		0.736662	0.0466035		0.690058	0.0270868	0.608798	0.771319
2	207129158	cg09448460	ZDBF2/GPR1:IG-DMR		0.490018	0.0441048		0.445913	0.0672212	0.244249	0.647577
2	207136184	cg10583266	ZDBF2/GPR1:IG-DMR		0.467317	0.0463772		0.42094	0.0449828	0.285991	0.555888
4	89618324	cg18772071	NAP1L5:TSS-DMR		0.506461	0.0451082		0.461353	0.0275195	0.378794	0.543911
4	89618533	cg05065100	NAP1L5:TSS-DMR		0.638645	0.0475851		0.59106	0.0366712	0.481046	0.701074
4	89618637	cg12759554	NAP1L5:TSS-DMR		0.663601	0.052591		0.61101	0.0433108	0.481078	0.740942
4	89618667	cg01578057	NAP1L5:TSS-DMR		0.591413	0.0180996		0.573314	0.0618892	0.387646	0.758981
4	89618861	cg27150681	NAP1L5:TSS-DMR		0.706822	0.0249017		0.68192	0.037333	0.569921	0.793919
4	89618982	cg23954636	NAP1L5:TSS-DMR		0.565062	-0.0109547		0.576017	0.0256531	0.499057	0.652976
4	89619014	cg01174175	NAP1L5:TSS-DMR		0.686033	0.015465		0.670568	0.0415342	0.545965	0.795171
4	89619023	cg06617468	NAP1L5:TSS-DMR		0.676232	0.00627528		0.669956	0.0424691	0.542549	0.797363
4	89619030	cg18607468	NAP1L5:TSS-DMR		0.597197	-0.0264005		0.623597	0.0282387	0.538881	0.708314
4	89619038	cg11300971	NAP1L5:TSS-DMR		0.707274	-0.0147227		0.721996	0.0203784	0.660861	0.783131
4	89619051	cg19151808	NAP1L5:TSS-DMR		0.735411	0.00294234		0.732468	0.0302429	0.64174	0.823197
4	89619053	cg01026744	NAP1L5:TSS-DMR		0.776656	0.0364571		0.740199	0.0492066	0.592579	0.887819
4	89619085	cg13610072	NAP1L5:TSS-DMR		0.770438	0.0246531		0.745784	0.0392516	0.62803	0.863539
4	89619236	cg07539802	NAP1L5:TSS-DMR		0.766262	0.0466956		0.719566	0.0327593	0.621288	0.817844
5	135414858	cg11852404	VTRNA2-1:DMR		0.930614	0.0328771		0.897737	0.0303771	0.806606	0.988868
5	135415129	cg16684184	VTRNA2-1:DMR		0.85128	0.0134148		0.837866	0.0478288	0.694379	0.981352
5	135415190	cg00308130	VTRNA2-1:DMR		0.72514	-0.0213258		0.746466	0.0572325	0.574768	0.918163
5	135415258	cg15837280	VTRNA2-1:DMR		0.55347	0.0660282		0.487441	0.0886637	0.22145	0.753432
5	135415693	cg07158503	VTRNA2-1:DMR		0.626895	0.0357697		0.591126	0.171874	0.075504	1.10675
5	135415762	cg04515200	VTRNA2-1:DMR		0.360324	0.00714699		0.353177	0.11184	0.0176558	0.688697
5	135415781	cg13581155	VTRNA2-1:DMR		0.223736	-0.014967		0.238703	0.0876033	-0.0241067	0.501513
5	135415948	cg11608150	VTRNA2-1:DMR		0.452236	-0.0264552		0.478691	0.149752	0.0294357	0.927947
5	135416029	cg06478886	VTRNA2-1:DMR		0.570359	0.0518963		0.518463	0.137049	0.107317	0.929609
5	135416205	cg04481923	VTRNA2-1:DMR		0.636566	0.0429787		0.593587	0.170631	0.0816927	1.10548
5	135416331	cg18678645	VTRNA2-1:DMR		0.67669	0.066814		0.609876	0.135685	0.202821	1.01693
5	135416381	cg06536614	VTRNA2-1:DMR		0.594903	0.00529296		0.58961	0.0829368	0.340799	0.83842
5	135416398	cg25340688	VTRNA2-1:DMR		0.613488	0.0141631		0.599325	0.0985566	0.303655	0.894994
5	135416405	cg26896946	VTRNA2-1:DMR		0.571127	0.0100608		0.561067	0.0804876	0.319604	0.802529
5	135416412	cg00124993	VTRNA2-1:DMR		0.47951	0.00589135		0.473619	0.103748	0.162375	0.784862
5	135416529	cg08745965	VTRNA2-1:DMR		0.590427	0.0658566		0.524571	0.112447	0.18723	0.861911
5	135416613	cg18797653	VTRNA2-1:DMR		0.700064	0.0283803		0.671684	0.0942852	0.388828	0.954539
6	3849095	cg18872973	FAM50B:TSS-DMR		0.728303	0.031163		0.69714	0.0358162	0.589691	0.804588
6	3849190	cg17739279	FAM50B:TSS-DMR		0.5734	0.0250269		0.548374	0.0339171	0.446622	0.650125
6	3849235	cg18656763	FAM50B:TSS-DMR		0.581544	0.0376142		0.54393	0.0319757	0.448003	0.639857
6	3849272	cg01570885	FAM50B:TSS-DMR		0.667122	0.0644152		0.602707	0.0273083	0.520782	0.684632
6	3849277	cg09821214	FAM50B:TSS-DMR		0.635151	0.0367144		0.598436	0.0380377	0.484323	0.712549
6	3849294	cg07898446	FAM50B:TSS-DMR		0.502827	0.0152178		0.487609	0.0268052	0.407193	0.568024
6	3849327	cg25195497	FAM50B:TSS-DMR		0.695249	0.051984		0.643265	0.0386983	0.527171	0.75936
6	3849331	cg21740964	FAM50B:TSS-DMR		0.801336	0.0825366		0.718799	0.0425432	0.59117	0.846429
6	3849350	cg13289019	FAM50B:TSS-DMR		0.455678	0.0251096		0.430568	0.0161359	0.38216	0.478975
6	3849381	cg12840312	FAM50B:TSS-DMR		0.614379	0.0175415		0.596837	0.0302832	0.505988	0.687687
6	3849391	cg01905633	FAM50B:TSS-DMR		0.508063	0.056763		0.4513	0.0331256	0.351923	0.550677
6	3849411	cg21177626	FAM50B:TSS-DMR		0.515724	0.0436249		0.472099	0.037919	0.358342	0.585856
6	3849434	cg03954573	FAM50B:TSS-DMR		0.726471	0.0590901		0.667381	0.0446912	0.533307	0.801454
6	3849442	cg19362611	FAM50B:TSS-DMR		0.80171	0.0599595		0.741751	0.0327239	0.643579	0.839922
6	3849475	cg04447621	FAM50B:TSS-DMR		0.683346	0.0414648		0.641882	0.0378935	0.528201	0.755562
6	3849536	cg23835083	FAM50B:TSS-DMR		0.697576	0.0463633		0.651213	0.0459693	0.513305	0.789121
6	3849577	cg12497786	FAM50B:TSS-DMR		0.766381	0.0494649		0.716916	0.0316439	0.621984	0.811848
6	3849688	cg03202897	FAM50B:TSS-DMR		0.815202	0.0468516		0.76835	0.0411065	0.645031	0.89167
6	3849690	cg21153160	FAM50B:TSS-DMR		0.573124	0.0516518		0.521472	0.0411682	0.397967	0.644977
6	3849702	cg25073793	FAM50B:TSS-DMR		0.767434	0.0677229		0.699711	0.033011	0.600678	0.798744
6	3849818	cg13101072	FAM50B:TSS-DMR		0.715521	0.0545711		0.66095	0.03492	0.55619	0.76571
6	3850106	cg05811173	FAM50B:TSS-DMR		0.627126	-0.0184116		0.645538	0.0393815	0.527393	0.763682
6	144328421	cg09730369	PLAGL1:alt-TSS-DMR		0.755187	-0.00810115		0.763288	0.03576	0.656008	0.870568
6	144328482	cg17865602	PLAGL1:alt-TSS-DMR		0.661872	0.0364265		0.625445	0.0364735	0.516025	0.734866
6	144328917	cg25350411	PLAGL1:alt-TSS-DMR		0.649109	0.049231		0.599878	0.0383268	0.484898	0.714859
6	144329052	cg07077459	PLAGL1:alt-TSS-DMR		0.676337	0.0244917		0.651845	0.0610859	0.468588	0.835103
6	144329172	cg22378065	PLAGL1:alt-TSS-DMR		0.645116	0.00477575		0.64034	0.0513655	0.486244	0.794437
6	144329382	cg22352234	PLAGL1:alt-TSS-DMR		0.584583	0.00840585		0.576178	0.0366611	0.466194	0.686161
6	144329473	cg00702231	PLAGL1:alt-TSS-DMR		0.76559	0.00968074		0.75591	0.0426625	0.627922	0.883897
6	144329485	cg12757684	PLAGL1:alt-TSS-DMR		0.508852	-0.00764599		0.516498	0.0432421	0.386772	0.646224
6	144329744	cg12820609	PLAGL1:alt-TSS-DMR		0.705484	0.0783714		0.627112	0.0621167	0.440762	0.813463
6	144329766	cg05326984	PLAGL1:alt-TSS-DMR		0.697817	0.0245466		0.67327	0.0538002	0.511869	0.834671
6	144329780	cg08263357	PLAGL1:alt-TSS-DMR		0.76672	0.0824287		0.684291	0.057386	0.512133	0.856449
6	144329789	cg11532302	PLAGL1:alt-TSS-DMR		0.605212	0.0545612		0.550651	0.0415781	0.425916	0.675385
6	144329802	cg27216384	PLAGL1:alt-TSS-DMR		0.443757	-0.0044258		0.448183	0.0342151	0.345537	0.550828
6	144329829	cg17895149	PLAGL1:alt-TSS-DMR		0.700226	0.0264434		0.673782	0.0404167	0.552532	0.795032
6	144329887	cg23460430	PLAGL1:alt-TSS-DMR		0.720129	0.108938		0.61119	0.0984899	0.315721	0.90666
6	160427347	cg16039889	IGF2R:Int2-DMR		0.700946	0.0317689		0.669177	0.0453696	0.533068	0.805285
6	160427501	cg08350488	IGF2R:Int2-DMR		0.619689	-0.00203583		0.621725	0.0515643	0.467032	0.776418
6	170055155	cg11938672	WDR27:Int13-DMR		0.674148	-0.0877713		0.761919	0.0389139	0.645177	0.87866
6	170055332	cg18322025	WDR27:Int13-DMR		0.528133	-0.0918489		0.619982	0.0611038	0.436671	0.803293
7	50849168	cg03104936	GRB10:alt-TSS-DMR		0.617536	0.0602321		0.557304	0.0584869	0.381843	0.732765
7	50849285	cg05998930	GRB10:alt-TSS-DMR		0.722017	0.063326		0.658691	0.0703472	0.447649	0.869732
7	50849639	cg09150232	GRB10:alt-TSS-DMR		0.706845	0.0968658		0.60998	0.0654656	0.413583	0.806376
7	50849723	cg16349612	GRB10:alt-TSS-DMR		0.645795	0.00842892		0.637366	0.031347	0.543325	0.731407
7	50849805	cg23742152	GRB10:alt-TSS-DMR		0.593509	0.0142031		0.579305	0.0585731	0.403586	0.755025
7	50849931	cg08835688	GRB10:alt-TSS-DMR		0.689339	0.0420865		0.647252	0.0527477	0.489009	0.805495
7	50850564	cg12903171	GRB10:alt-TSS-DMR		0.664459	0.0460955		0.618364	0.0453483	0.482319	0.754409
7	50850635	cg23023285	GRB10:alt-TSS-DMR		0.704052	0.0827899		0.621262	0.0436788	0.490226	0.752299
7	50850755	cg27653667	GRB10:alt-TSS-DMR		0.400658	0.0294527		0.371206	0.049188	0.223642	0.518769
7	50850870	cg24977055	GRB10:alt-TSS-DMR		0.617765	0.0212367		0.596528	0.02996	0.506648	0.686408
7	94285642	cg19107595	PEG10:TSS-DMR		0.300683	0.0407826		0.2599	0.0258997	0.182201	0.337599
7	94285672	cg19924104	PEG10:TSS-DMR		0.494266	0.0275307		0.466735	0.0303747	0.375611	0.557859
7	94285685	cg11589966	PEG10:TSS-DMR		0.546831	0.00528344		0.541547	0.0288239	0.455076	0.628019
7	94285687	cg05531533	PEG10:TSS-DMR		0.522703	0.00498156		0.517721	0.0329041	0.419009	0.616433
7	94285712	cg27435646	PEG10:TSS-DMR		0.613449	0.00449165		0.608957	0.0368225	0.49849	0.719425
7	94285745	cg01566785	PEG10:TSS-DMR		0.620849	0.013379		0.60747	0.0247527	0.533211	0.681728
7	94285759	cg05819130	PEG10:TSS-DMR		0.61138	-0.00911849		0.620498	0.0247168	0.546348	0.694648
7	94285784	cg02965180	PEG10:TSS-DMR		0.579706	0.00622923		0.573477	0.0310553	0.480311	0.666643
7	94285814	cg05277165	PEG10:TSS-DMR		0.562528	0.0130787		0.549449	0.0204784	0.488014	0.610885
7	94285873	cg13660372	PEG10:TSS-DMR		0.580307	0.00870515		0.571602	0.0314163	0.477353	0.665851
7	94285887	cg06674062	PEG10:TSS-DMR		0.594254	0.0278769		0.566377	0.0380609	0.452194	0.680559
7	94285911	cg07921535	PEG10:TSS-DMR		0.458523	-0.0117869		0.47031	0.0313315	0.376316	0.564305
7	94285942	cg09910998	PEG10:TSS-DMR		0.554001	-0.00685459		0.560856	0.0430852	0.4316	0.690111
7	94285951	cg27393730	PEG10:TSS-DMR		0.334885	-0.0369167		0.371802	0.035032	0.266706	0.476898
7	94285960	cg08291000	PEG10:TSS-DMR		0.653982	0.0362303		0.617751	0.0336216	0.516886	0.718616
7	94285993	cg27230044	PEG10:TSS-DMR		0.708599	0.0865184		0.622081	0.0457331	0.484882	0.75928
7	94286086	cg24885794	PEG10:TSS-DMR		0.600599	0.016319		0.58428	0.0392667	0.46648	0.70208
7	94286110	cg26997085	PEG10:TSS-DMR		0.575987	0.0182693		0.557718	0.0388378	0.441205	0.674231
7	94286131	cg22331138	PEG10:TSS-DMR		0.722462	0.0317101		0.690752	0.0413647	0.566658	0.814846
7	94286208	cg16492735	PEG10:TSS-DMR		0.756367	0.0350059		0.721361	0.0442438	0.58863	0.854093
7	94286219	cg09512080	PEG10:TSS-DMR		0.675953	0.0183878		0.657565	0.0533348	0.497561	0.817569
7	94286232	cg00906934	PEG10:TSS-DMR		0.678143	0.0301435		0.647999	0.0554001	0.481799	0.814199
7	94286243	cg26503018	PEG10:TSS-DMR		0.677598	0.00986768		0.66773	0.0509903	0.51476	0.820701
7	94286261	cg27120649	PEG10:TSS-DMR		0.494747	0.0175833		0.477164	0.0329471	0.378322	0.576005
7	94286263	cg21771834	PEG10:TSS-DMR		0.717314	0.0560103		0.661304	0.0551439	0.495873	0.826736
7	94286267	cg27001184	PEG10:TSS-DMR		0.72526	-0.00438449		0.729644	0.0547453	0.565409	0.89388
7	94286294	cg23342787	PEG10:TSS-DMR		0.810651	0.00899111		0.80166	0.0403	0.68076	0.92256
7	94286304	cg14873490	PEG10:TSS-DMR		0.532688	-0.0173108		0.549999	0.0333935	0.449819	0.65018
7	94286343	cg03384175	PEG10:TSS-DMR		0.790964	0.0333491		0.757615	0.0364874	0.648152	0.867077
7	94286351	cg11985632	PEG10:TSS-DMR		0.70024	-0.00485896		0.705099	0.028264	0.620307	0.789891
7	94286362	cg13797824	PEG10:TSS-DMR		0.73012	0.00717923		0.722941	0.0438353	0.591435	0.854447
7	94286420	cg11175683	PEG10:TSS-DMR		0.712203	0.0234104		0.688793	0.0442197	0.556134	0.821452
7	94286431	cg04521244	PEG10:TSS-DMR		0.730995	0.0369756		0.694019	0.0385924	0.578242	0.809797
7	94286473	cg11562309	PEG10:TSS-DMR		0.645576	0.0314194		0.614157	0.0349857	0.5092	0.719114
7	94286484	cg18898992	PEG10:TSS-DMR		0.682733	0.0324761		0.650256	0.0314336	0.555956	0.744557
7	94286511	cg05096321	PEG10:TSS-DMR		0.598177	0.00959886		0.588578	0.0446299	0.454688	0.722468
7	94286521	cg19663555	PEG10:TSS-DMR		0.722416	0.00087028		0.721546	0.0459212	0.583782	0.859309
7	94286526	cg06695761	PEG10:TSS-DMR		0.699321	0.0117776		0.687543	0.0512642	0.533751	0.841336
7	94286559	cg21853542	PEG10:TSS-DMR		0.766481	0.000279894		0.766201	0.0384849	0.650746	0.881656
7	94286650	cg09890341	PEG10:TSS-DMR		0.719939	0.0280444		0.691894	0.0394356	0.573588	0.810201
7	94286669	cg20041873	PEG10:TSS-DMR		0.662642	-0.00885241		0.671494	0.0351269	0.566113	0.776875
7	94286753	cg04303139	PEG10:TSS-DMR		0.601994	0.0236754		0.578318	0.0462543	0.439555	0.717081
7	94286760	cg03436478	PEG10:TSS-DMR		0.638637	-0.00468925		0.643326	0.0393374	0.525314	0.761339
7	94286793	cg05509218	PEG10:TSS-DMR		0.68663	0.0019572		0.684673	0.0267501	0.604422	0.764923
7	94286834	cg22924867	PEG10:TSS-DMR		0.664829	0.027489		0.63734	0.0384483	0.521996	0.752685
7	94286936	cg01169624	PEG10:TSS-DMR		0.7037	0.0423495		0.66135	0.0268377	0.580837	0.741863
7	94286953	cg03682823	PEG10:TSS-DMR		0.627779	0.022083		0.605696	0.033248	0.505952	0.70544
7	94286955	cg18139769	PEG10:TSS-DMR		0.668065	0.0411336		0.626931	0.0365189	0.517375	0.736488
7	94287186	cg12397924	PEG10:TSS-DMR		0.484112	0.0471317		0.43698	0.035442	0.330654	0.543306
7	94287211	cg15696408	PEG10:TSS-DMR		0.365636	0.0210245		0.344612	0.0387258	0.228434	0.460789
7	94287242	cg22820921	PEG10:TSS-DMR		0.578219	0.131487		0.446733	0.0251057	0.371415	0.52205
7	130130122	cg10473158	MEST:alt-TSS-DMR		0.794067	-0.0238547		0.817922	0.034275	0.715097	0.920746
7	130130155	cg05222671	MEST:alt-TSS-DMR		0.836171	-0.0364412		0.872612	0.0382043	0.757999	0.987225
7	130130187	cg10767216	MEST:alt-TSS-DMR		0.739243	-0.0216534		0.760896	0.0282925	0.676018	0.845774
7	130130288	cg17347253	MEST:alt-TSS-DMR		0.715866	0.0202702		0.695596	0.0423594	0.568518	0.822674
7	130130320	cg02756856	MEST:alt-TSS-DMR		0.822476	-0.0348075		0.857284	0.0365685	0.747578	0.966989
7	130130383	cg26275543	MEST:alt-TSS-DMR		0.763043	-0.00227787		0.765321	0.0341237	0.66295	0.867693
7	130130478	cg20826277	MEST:alt-TSS-DMR		0.769635	0.00804755		0.761588	0.0515441	0.606956	0.91622
7	130130481	cg14584935	MEST:alt-TSS-DMR		0.762364	0.0114118		0.750953	0.0584647	0.575559	0.926347
7	130130588	cg24941047	MEST:alt-TSS-DMR		0.926001	0.000574876		0.925426	0.0203444	0.864393	0.98646
7	130130596	cg07427065	MEST:alt-TSS-DMR		0.773774	0.023508		0.750266	0.049714	0.601124	0.899408
7	130130740	cg02501418	MEST:alt-TSS-DMR		0.817325	0.0350004		0.782325	0.034275	0.6795	0.88515
7	130130747	cg08229366	MEST:alt-TSS-DMR		0.728593	0.007603		0.72099	0.0285179	0.635436	0.806544
7	130130753	cg07224147	MEST:alt-TSS-DMR		0.386841	0.0141947		0.372646	0.0479078	0.228923	0.51637
7	130130918	cg27417677	MEST:alt-TSS-DMR		0.754321	0.0287101		0.725611	0.0418682	0.600006	0.851216
7	130130995	cg09003373	MEST:alt-TSS-DMR		0.602938	0.0388406		0.564098	0.0515317	0.409503	0.718693
7	130131085	cg14088957	MEST:alt-TSS-DMR		0.539769	-0.00101814		0.540787	0.051139	0.38737	0.694204
7	130131136	cg06100421	MEST:alt-TSS-DMR		0.653378	0.0255387		0.627839	0.0502896	0.47697	0.778708
7	130131138	cg20297423	MEST:alt-TSS-DMR		0.63834	0.0433713		0.594969	0.0485426	0.449341	0.740596
7	130131146	cg05369791	MEST:alt-TSS-DMR		0.439864	-0.0437038		0.483567	0.03962	0.364707	0.602427
7	130131189	cg08734637	MEST:alt-TSS-DMR		0.603922	0.0402908		0.563631	0.0282557	0.478864	0.648398
7	130131258	cg13917504	MEST:alt-TSS-DMR		0.675945	0.0412771		0.634668	0.0471189	0.493312	0.776025
7	130131268	cg25407198	MEST:alt-TSS-DMR		0.711455	0.0519419		0.659513	0.0443864	0.526354	0.792673
7	130131359	cg21667116	MEST:alt-TSS-DMR		0.650898	0.0398169		0.611081	0.0512043	0.457468	0.764694
7	130131367	cg23156962	MEST:alt-TSS-DMR		0.576986	0.0234693		0.553517	0.0561578	0.385044	0.72199
7	130131403	cg04678950	MEST:alt-TSS-DMR		0.689923	0.00416402		0.685759	0.0390523	0.568602	0.802916
7	130131480	cg17079325	MEST:alt-TSS-DMR		0.758062	0.0563488		0.701714	0.0359194	0.593955	0.809472
7	130131484	cg04344875	MEST:alt-TSS-DMR		0.735186	0.0107234		0.724462	0.0447779	0.590129	0.858796
7	130131633	cg00286878	MEST:alt-TSS-DMR		0.803425	0.057119		0.746306	0.0455703	0.609595	0.883016
7	130131676	cg12347392	MEST:alt-TSS-DMR		0.695181	0.0373334		0.657847	0.03693	0.547057	0.768637
7	130131691	cg04786207	MEST:alt-TSS-DMR		0.647615	-0.0244852		0.672101	0.0293455	0.584064	0.760137
7	130131730	cg26708559	MEST:alt-TSS-DMR		0.726879	0.0442528		0.682627	0.0499401	0.532806	0.832447
7	130131797	cg22705386	MEST:alt-TSS-DMR		0.734615	0.00355489		0.73106	0.037914	0.617318	0.844802
7	130131826	cg06212135	MEST:alt-TSS-DMR		0.773712	0.00758031		0.766132	0.0334583	0.665757	0.866507
7	130131829	cg10249538	MEST:alt-TSS-DMR		0.741345	0.0220851		0.71926	0.0293162	0.631311	0.807209
7	130131869	cg16823958	MEST:alt-TSS-DMR		0.760397	0.0156337		0.744763	0.0350781	0.639529	0.849998
7	130131885	cg27338480	MEST:alt-TSS-DMR		0.706666	0.00266418		0.704002	0.0435341	0.573399	0.834604
7	130131887	cg09080913	MEST:alt-TSS-DMR		0.713329	0.0189901		0.694339	0.0420369	0.568228	0.82045
7	130131905	cg13104298	MEST:alt-TSS-DMR		0.770589	0.0167397		0.75385	0.0404865	0.63239	0.875309
7	130131921	cg21629528	MEST:alt-TSS-DMR		0.483504	0.0148892		0.468615	0.0297465	0.379376	0.557854
7	130132161	cg05556276	MEST:alt-TSS-DMR		0.669691	0.0156012		0.65409	0.0437405	0.522868	0.785311
7	130132199	cg17580798	MEST:alt-TSS-DMR		0.699402	0.0213985		0.678003	0.0462775	0.539171	0.816835
7	130132259	cg05862114	MEST:alt-TSS-DMR		0.467989	0.0372872		0.430702	0.0611348	0.247297	0.614106
7	130132265	cg01784351	MEST:alt-TSS-DMR		0.603347	0.0175836		0.585764	0.0541579	0.42329	0.748237
7	130132286	cg27589003	MEST:alt-TSS-DMR		0.604672	0.0262577		0.578414	0.0536166	0.417564	0.739264
7	130132305	cg23714917	MEST:alt-TSS-DMR		0.715644	0.0134435		0.7022	0.0272158	0.620553	0.783848
7	130132360	cg25519926	MEST:alt-TSS-DMR		0.705546	0.00705803		0.698488	0.0314361	0.60418	0.792797
7	130132419	cg22592140	MEST:alt-TSS-DMR		0.696977	0.0176557		0.679321	0.0423808	0.552179	0.806463
7	130132422	cg03588221	MEST:alt-TSS-DMR		0.753335	0.0359076		0.717428	0.0479517	0.573573	0.861283
7	130132453	cg13986840	MEST:alt-TSS-DMR		0.683038	0.0640335		0.619005	0.050708	0.466881	0.771129
7	130133110	cg05260959	MEST:alt-TSS-DMR		0.76663	0.0139385		0.752692	0.0225005	0.68519	0.820193
7	130134256	cg18622506	MEST:alt-TSS-DMR		0.368336	-0.0692121		0.437548	0.0453075	0.301626	0.573471
7	138348774	cg05719902	SVOPL:alt-TSS-DMR		0.340009	0.0214398		0.318569	0.0634778	0.128135	0.509002
7	154862770	cg25780543	HTR5A:TSS-DMR		0.431652	0.0403788		0.391274	0.0416668	0.266273	0.516274
7	154862969	cg00852398	HTR5A:TSS-DMR		0.618477	0.0298594		0.588618	0.0290173	0.501566	0.675669
7	154863007	cg09125907	HTR5A:TSS-DMR		0.7381	0.0874455		0.650655	0.0482212	0.505991	0.795318
7	154863176	cg25058023	HTR5A:TSS-DMR		0.606435	0.0548748		0.55156	0.0339463	0.449722	0.653399
7	154863244	cg03024742	HTR5A:TSS-DMR		0.662414	0.00771432		0.654699	0.0414062	0.530481	0.778918
7	154863323	cg13892088	HTR5A:TSS-DMR		0.75889	0.0654263		0.693464	0.0371437	0.582033	0.804895
7	154863338	cg10538202	HTR5A:TSS-DMR		0.813404	0.083435		0.729969	0.0486634	0.583979	0.875959
7	154863381	cg09623773	HTR5A:TSS-DMR		0.716591	-0.0238186		0.74041	0.0518616	0.584825	0.895994
8	37605517	cg13346869	ERLIN2:Int6-DMR		0.585871	0.0110812		0.574789	0.0651897	0.37922	0.770358
8	37605552	cg05020125	ERLIN2:Int6-DMR		0.522942	-0.00646855		0.529411	0.0419757	0.403484	0.655338
8	37605717	cg21505509	ERLIN2:Int6-DMR		0.588916	-0.02311		0.612026	0.0410321	0.488929	0.735122
8	37605783	cg08247852	ERLIN2:Int6-DMR		0.668272	0.027279		0.640993	0.0192731	0.583174	0.698812
8	37605936	cg09188212	ERLIN2:Int6-DMR		0.747477	-0.00930182		0.756779	0.0331862	0.65722	0.856338
8	37605978	cg00450319	ERLIN2:Int6-DMR		0.542577	-0.0407024		0.583279	0.0399484	0.463434	0.703124
8	141108607	cg21926091	PEG13:TSS-DMR		0.741745	0.000943598		0.740802	0.028661	0.654819	0.826785
8	141108998	cg22502459	PEG13:TSS-DMR		0.823348	0.0370815		0.786266	0.028555	0.700601	0.871931
8	141109051	cg13713522	PEG13:TSS-DMR		0.771922	-0.00474147		0.776664	0.033659	0.675687	0.877641
8	141109628	cg17763909	PEG13:TSS-DMR		0.793931	0.024527		0.769404	0.0319557	0.673537	0.865271
8	141109731	cg07878171	PEG13:TSS-DMR		0.700731	0.0335486		0.667182	0.0310765	0.573953	0.760411
8	141110260	cg03803002	PEG13:TSS-DMR		0.733993	0.0183328		0.715661	0.046779	0.575324	0.855997
8	141110747	cg00155882	PEG13:TSS-DMR		0.629975	0.0188041		0.611171	0.0464035	0.471961	0.750382
8	141110900	cg22807877	PEG13:TSS-DMR		0.58269	0.00678614		0.575904	0.0341562	0.473435	0.678373
9	98075492	cg21891967	FANCC:Int1-DMR		0.596151	0.0147542		0.581397	0.0498152	0.431951	0.730843
10	121578129	cg26352088	INPP5F:Int2-DMR		0.704193	0.0134503		0.690743	0.0422453	0.564007	0.817479
10	121578137	cg02722214	INPP5F:Int2-DMR		0.721858	0.0034578		0.7184	0.038651	0.602447	0.834353
10	121578384	cg20365618	INPP5F:Int2-DMR		0.633722	0.0299753		0.603746	0.0441785	0.471211	0.736282
10	121578561	cg02857557	INPP5F:Int2-DMR		0.723958	0.0231309		0.700828	0.0331984	0.601232	0.800423
10	121578625	cg01729557	INPP5F:Int2-DMR		0.754463	0.0225036		0.731959	0.0337339	0.630757	0.833161
10	121578639	cg25045785	INPP5F:Int2-DMR		0.701244	-0.00803682		0.709281	0.0482396	0.564562	0.854
11	2019079	cg11753499	H19/IGF2:IG-DMR		0.583379	0.0253581		0.558021	0.0385608	0.442339	0.673703
11	2019090	cg13210239	H19/IGF2:IG-DMR		0.695732	0.0436868		0.652045	0.0297886	0.562679	0.741411
11	2019116	cg17985533	H19/IGF2:IG-DMR		0.586226	0.0250298		0.561196	0.0346816	0.457151	0.665241
11	2019129	cg15922305	H19/IGF2:IG-DMR		0.628387	0.0138409		0.614546	0.0327073	0.516424	0.712668
11	2019436	cg09701145	H19/IGF2:IG-DMR		0.687692	0.0260142		0.661678	0.0306428	0.569749	0.753607
11	2019452	cg25437674	H19/IGF2:IG-DMR		0.599213	0.0255598		0.573653	0.04913	0.426263	0.721043
11	2019568	cg17769238	H19/IGF2:IG-DMR		0.768212	0.0435811		0.724631	0.0438262	0.593153	0.85611
11	2019587	cg04975775	H19/IGF2:IG-DMR		0.743363	0.0440203		0.699343	0.0598752	0.519717	0.878968
11	2019606	cg15886040	H19/IGF2:IG-DMR		0.734574	0.074317		0.660257	0.0552069	0.494637	0.825878
11	2019624	cg10154633	H19/IGF2:IG-DMR		0.682419	0.00407856		0.678341	0.0421752	0.551815	0.804866
11	2019626	cg26469586	H19/IGF2:IG-DMR		0.682621	0.0167537		0.665867	0.0457304	0.528676	0.803058
11	2019655	cg24409677	H19/IGF2:IG-DMR		0.65836	0.0337874		0.624573	0.0310704	0.531362	0.717784
11	2019667	cg16303279	H19/IGF2:IG-DMR		0.69522	0.000622173		0.694598	0.0405525	0.57294	0.816255
11	2019730	cg02694715	H19/IGF2:IG-DMR		0.655579	0.0137405		0.641839	0.0240468	0.569698	0.713979
11	2019732	cg11735853	H19/IGF2:IG-DMR		0.555302	-0.0255641		0.580866	0.030999	0.487869	0.673863
11	2019736	cg01977486	H19/IGF2:IG-DMR		0.813488	0.0241408		0.789347	0.0417976	0.663954	0.91474
11	2019823	cg13581483	H19/IGF2:IG-DMR		0.677893	-0.00856056		0.686453	0.0332732	0.586634	0.786273
11	2019859	cg04088212	H19/IGF2:IG-DMR		0.650715	-0.00777114		0.658486	0.0444399	0.525167	0.791806
11	2019862	cg01539474	H19/IGF2:IG-DMR		0.75934	-0.0120399		0.77138	0.0404859	0.649922	0.892838
11	2019930	cg18362496	H19/IGF2:IG-DMR		0.70145	-0.00935172		0.710801	0.0448776	0.576169	0.845434
11	2019943	cg24605090	H19/IGF2:IG-DMR		0.738523	-0.0254099		0.763932	0.0414022	0.639726	0.888139
11	2020101	cg16675558	H19/IGF2:IG-DMR		0.937807	-0.00338019		0.941187	0.0122777	0.904354	0.97802
11	2020104	cg03996735	H19/IGF2:IG-DMR		0.852682	-0.0236497		0.876331	0.024405	0.803117	0.949546
11	2020118	cg18104242	H19/IGF2:IG-DMR		0.866674	-0.0318342		0.898508	0.0188016	0.842103	0.954913
11	2020129	cg27300742	H19/IGF2:IG-DMR		0.757951	-0.0604752		0.818427	0.0519687	0.66252	0.974333
11	2020279	cg25281616	H19/IGF2:IG-DMR		0.756683	-0.0530316		0.809715	0.0521167	0.653365	0.966065
11	2020286	cg01895612	H19/IGF2:IG-DMR		0.678193	-0.0478483		0.726042	0.0631635	0.536551	0.915532
11	2020296	cg23476401	H19/IGF2:IG-DMR		0.655869	-0.156524		0.812394	0.0378259	0.698916	0.925871
11	2020314	cg00237904	H19/IGF2:IG-DMR		0.678585	-0.0826472		0.761232	0.0518766	0.605602	0.916862
11	2020417	cg25821896	H19/IGF2:IG-DMR		0.713563	-0.0133714		0.726935	0.0420228	0.600866	0.853003
11	2020537	cg18454954	H19/IGF2:IG-DMR		0.638994	0.0297847		0.609209	0.0412774	0.485377	0.733041
11	2020549	cg25579157	H19/IGF2:IG-DMR		0.568633	-0.00948094		0.578114	0.0162163	0.529465	0.626763
11	2020556	cg02886509	H19/IGF2:IG-DMR		0.558912	-0.0613832		0.620295	0.0487475	0.474052	0.766537
11	2020560	cg02657360	H19/IGF2:IG-DMR		0.615642	0.0100229		0.605619	0.0503687	0.454512	0.756725
11	2022324	cg16574793	H19/IGF2:IG-DMR		0.68849	0.0215518		0.666939	0.058332	0.491943	0.841935
11	2022386	cg09452478	H19/IGF2:IG-DMR		0.642466	0.0172723		0.625194	0.0572281	0.45351	0.796878
11	2022748	cg06658831	H19/IGF2:IG-DMR		0.607228	0.0289285		0.5783	0.0422773	0.451468	0.705132
11	2023865	cg20891060	H19/IGF2:IG-DMR		0.753061	-0.0214878		0.774549	0.027745	0.691314	0.857784
11	2153991	cg02807948	IGF2:Ex9-DMR		0.439439	0.0321792		0.40726	0.0357125	0.300123	0.514398
11	2154074	cg12528452	IGF2:Ex9-DMR		0.577461	0.0516442		0.525817	0.059659	0.34684	0.704794
11	2154113	cg13165070	IGF2:Ex9-DMR		0.369218	-0.00998606		0.379204	0.0298025	0.289797	0.468612
11	2154132	cg11717189	IGF2:Ex9-DMR		0.413476	0.00501771		0.408458	0.0351332	0.303059	0.513858
11	2154255	cg07096953	IGF2:Ex9-DMR		0.212714	0.0146622		0.198051	0.0336835	0.0970009	0.299102
11	2154386	cg02613624	IGF2:Ex9-DMR		0.721456	0.0183789		0.703077	0.0283203	0.618116	0.788038
11	2154432	cg22956483	IGF2:Ex9-DMR		0.30887	0.0183503		0.290519	0.019288	0.232655	0.348383
11	2154638	cg26401390	IGF2:Ex9-DMR		0.557989	-0.00724576		0.565235	0.0313139	0.471293	0.659176
11	2154934	cg05384664	IGF2:Ex9-DMR		0.646188	0.0519268		0.594262	0.0418154	0.468816	0.719708
11	2154952	cg00570518	IGF2:Ex9-DMR		0.604187	0.0117792		0.592408	0.0402733	0.471588	0.713228
11	2168625	cg19642877	IGF2:alt-TSS-DMR		0.505561	0.0248288		0.480732	0.0537247	0.319558	0.641906
11	2169138	cg20622142	IGF2:alt-TSS-DMR		0.378489	0.0448844		0.333605	0.0161709	0.285092	0.382118
11	2720229	cg27119222	KCNQ1OT1:TSS-DMR		0.64955	-0.0329644		0.682514	0.0274754	0.600088	0.764941
11	2720463	cg00000924	KCNQ1OT1:TSS-DMR		0.787107	0.168847		0.61826	0.136849	0.207713	1.02881
11	2720810	cg11297256	KCNQ1OT1:TSS-DMR		0.383869	-0.0188182		0.402687	0.0358734	0.295067	0.510307
11	2721243	cg12077660	KCNQ1OT1:TSS-DMR		0.583481	0.00449789		0.578984	0.0325491	0.481336	0.676631
11	2721248	cg03401726	KCNQ1OT1:TSS-DMR		0.65032	0.0095442		0.640776	0.0547289	0.476589	0.804962
11	2721336	cg16739686	KCNQ1OT1:TSS-DMR		0.598022	-0.0272841		0.625306	0.0483541	0.480244	0.770368
11	2721351	cg08359167	KCNQ1OT1:TSS-DMR		0.599205	0.0178367		0.581369	0.0283501	0.496318	0.666419
11	2721366	cg08446215	KCNQ1OT1:TSS-DMR		0.70781	-0.0126835		0.720493	0.0354545	0.61413	0.826857
11	2721383	cg26104781	KCNQ1OT1:TSS-DMR		0.756881	0.02551		0.731371	0.0369612	0.620488	0.842255
11	2721409	cg02219360	KCNQ1OT1:TSS-DMR		0.616877	0.0131471		0.60373	0.0341325	0.501332	0.706127
11	2721480	cg07595203	KCNQ1OT1:TSS-DMR		0.638255	0.0311955		0.60706	0.0539644	0.445166	0.768953
11	2721591	cg09518720	KCNQ1OT1:TSS-DMR		0.749886	0.0619387		0.687947	0.0420668	0.561746	0.814147
11	2721610	cg14958441	KCNQ1OT1:TSS-DMR		0.714138	0.0583244		0.655814	0.0651791	0.460276	0.851351
11	2721619	cg27323091	KCNQ1OT1:TSS-DMR		0.632481	-0.00105767		0.633538	0.0386854	0.517482	0.749594
11	2721632	cg01873334	KCNQ1OT1:TSS-DMR		0.776892	0.00225838		0.774634	0.0278484	0.691089	0.858179
11	2721799	cg05816130	KCNQ1OT1:TSS-DMR		0.732404	0.0220658		0.710338	0.0521682	0.553833	0.866842
11	2721817	cg14243741	KCNQ1OT1:TSS-DMR		0.727946	0.0382521		0.689694	0.0508318	0.537198	0.842189
11	2721866	cg05740879	KCNQ1OT1:TSS-DMR		0.790366	0.0430706		0.747296	0.0388245	0.630822	0.863769
11	2721952	cg01893176	KCNQ1OT1:TSS-DMR		0.704705	0.0553017		0.649403	0.0457721	0.512087	0.786719
11	2722062	cg11666921	KCNQ1OT1:TSS-DMR		0.535806	0.0270109		0.508795	0.0526629	0.350806	0.666784
11	2722073	cg26094482	KCNQ1OT1:TSS-DMR		0.423549	-0.0424953		0.466045	0.0370061	0.355026	0.577063
11	2722082	cg03422070	KCNQ1OT1:TSS-DMR		0.710021	-0.0114895		0.721511	0.0469183	0.580756	0.862265
11	2722084	cg15651941	KCNQ1OT1:TSS-DMR		0.629555	0.0428712		0.586684	0.0361536	0.478223	0.695145
11	2722086	cg25306939	KCNQ1OT1:TSS-DMR		0.656547	0.0363052		0.620242	0.029514	0.5317	0.708784
11	2722195	cg02798157	KCNQ1OT1:TSS-DMR		0.540058	0.0420569		0.498001	0.0298084	0.408576	0.587426
13	48892551	cg27182551	RB1:Int2-DMR		0.914275	0.0218506		0.892424	0.0361434	0.783994	1.00085
13	48893174	cg13431205	RB1:Int2-DMR		0.697345	0.0439798		0.653366	0.0525319	0.49577	0.810961
13	48893376	cg03085377	RB1:Int2-DMR		0.670628	0.0105925		0.660036	0.0653351	0.464031	0.856041
13	48893727	cg18481241	RB1:Int2-DMR		0.679898	0.031468		0.64843	0.0563018	0.479525	0.817335
13	48894214	cg25676335	RB1:Int2-DMR		0.792444	0.00734441		0.7851	0.0267239	0.704928	0.865271
13	48894382	cg00059930	RB1:Int2-DMR		0.681153	0.0433464		0.637806	0.0604705	0.456395	0.819218
13	48895241	cg26740195	RB1:Int2-DMR		0.648905	0.0222711		0.626634	0.0501802	0.476093	0.777175
13	48895318	cg27026713	RB1:Int2-DMR		0.693172	0.0390531		0.654119	0.0264708	0.574707	0.733532
14	101290556	cg00764369	MEG3:TSS-DMR		0.86073	-0.0251213		0.885851	0.0324418	0.788526	0.983177
14	101290717	cg10515315	MEG3:TSS-DMR		0.73723	-0.0153399		0.75257	0.0529355	0.593764	0.911377
14	101290867	cg15991553	MEG3:TSS-DMR		0.75843	-0.0190276		0.777458	0.0308346	0.684954	0.869961
14	101291068	cg23870378	MEG3:TSS-DMR		0.850022	0.00725115		0.84277	0.0511195	0.689412	0.996129
14	101291100	cg14034270	MEG3:TSS-DMR		0.923443	-0.00395084		0.927394	0.0203233	0.866424	0.988364
14	101291136	cg16567044	MEG3:TSS-DMR		0.705904	-0.0373458		0.74325	0.0607428	0.561022	0.925478
14	101291180	cg10540302	MEG3:TSS-DMR		0.812836	-0.00457594		0.817412	0.0569492	0.646564	0.988259
14	101291288	cg02313552	MEG3:TSS-DMR		0.643985	-0.089682		0.733667	0.0372998	0.621768	0.845566
14	101291410	cg02982753	MEG3:TSS-DMR		0.647854	0.0445341		0.60332	0.0338954	0.501634	0.705006
14	101291440	cg02888166	MEG3:TSS-DMR		0.779924	-0.0176189		0.797543	0.0390794	0.680304	0.914781
14	101291459	cg24089209	MEG3:TSS-DMR		0.769172	0.00185128		0.767321	0.0429766	0.638391	0.89625
14	101291469	cg16738180	MEG3:TSS-DMR		0.760273	0.0141042		0.746169	0.0390461	0.629031	0.863307
14	101291500	cg19643803	MEG3:TSS-DMR		0.62124	0.0742803		0.54696	0.0349423	0.442133	0.651786
14	101291602	cg10065153	MEG3:TSS-DMR		0.741804	0.0864634		0.655341	0.0432061	0.525722	0.784959
14	101291687	cg09280976	MEG3:TSS-DMR		0.864326	0.0136211		0.850705	0.0358537	0.743144	0.958266
14	101291829	cg22940816	MEG3:TSS-DMR		0.682543	0.0525669		0.629976	0.0506112	0.478143	0.78181
14	101291856	cg14070323	MEG3:TSS-DMR		0.751991	0.00255985		0.749431	0.03049	0.657961	0.840901
14	101291891	cg14119337	MEG3:TSS-DMR		0.54248	0.00701527		0.535465	0.0230902	0.466194	0.604735
14	101291933	cg20952167	MEG3:TSS-DMR		0.581957	0.00858335		0.573374	0.0360325	0.465276	0.681471
14	101291997	cg12967319	MEG3:TSS-DMR		0.622565	0.0296936		0.592871	0.0480364	0.448762	0.736981
14	101292128	cg04304932	MEG3:TSS-DMR		0.708123	0.013633		0.69449	0.0301671	0.603989	0.784991
14	101292149	cg04576764	MEG3:TSS-DMR		0.703939	0.0247039		0.679235	0.0247842	0.604882	0.753587
14	101292306	cg25836301	MEG3:TSS-DMR		0.757087	0.0551994		0.701887	0.0453967	0.565697	0.838077
14	101292392	cg09926418	MEG3:TSS-DMR		0.759034	0.0378661		0.721168	0.0513426	0.56714	0.875196
14	101292419	cg14759154	MEG3:TSS-DMR		0.818763	0.0473183		0.771445	0.0415874	0.646683	0.896207
14	101292643	cg23176399	MEG3:TSS-DMR		0.731303	0.0173792		0.713923	0.0522719	0.557108	0.870739
14	101292680	cg05711886	MEG3:TSS-DMR		0.633865	-0.0200656		0.65393	0.0358257	0.546453	0.761407
14	101292872	cg15419911	MEG3:TSS-DMR		0.680367	-0.0083846		0.688752	0.0219801	0.622812	0.754692
14	101292967	cg14245102	MEG3:TSS-DMR		0.613499	0.0346888		0.578811	0.0271016	0.497506	0.660115
14	101293090	cg15373285	MEG3:TSS-DMR		0.669325	0.0454629		0.623862	0.0431671	0.494361	0.753363
14	101293450	cg14123427	MEG3:TSS-DMR		0.619414	0.0415444		0.57787	0.036841	0.467347	0.688393
14	101293635	cg00743158	MEG3:TSS-DMR		0.792396	0.0211031		0.771293	0.0404515	0.649938	0.892647
14	101293645	cg09291977	MEG3:TSS-DMR		0.750444	0.029006		0.721438	0.040424	0.600166	0.84271
14	101293726	cg15101633	MEG3:TSS-DMR		0.712616	0.040904		0.671712	0.0423517	0.544657	0.798768
14	101293856	cg26374305	MEG3:TSS-DMR		0.625385	0.0638829		0.561502	0.0459395	0.423684	0.699321
14	101370989	cg06804177	MEG8:Int2-DMR		0.720448	-0.00348246		0.72393	0.040237	0.60322	0.844641
15	23807180	cg17819168	MKRN3:TSS-DMR		0.828925	0.0376246		0.7913	0.0264601	0.71192	0.87068
15	23807234	cg13423098	MKRN3:TSS-DMR		0.646391	-0.0150699		0.66146	0.0619857	0.475503	0.847418
15	23809945	cg07501539	MKRN3:TSS-DMR		0.790849	0.0734551		0.717394	0.0581336	0.542994	0.891795
15	23810163	cg09437135	MKRN3:TSS-DMR		0.650532	0.0136429		0.636889	0.0649618	0.442004	0.831774
15	23810238	cg20769842	MKRN3:TSS-DMR		0.685939	0.0473941		0.638545	0.0525993	0.480747	0.796343
15	23810280	cg16131766	MKRN3:TSS-DMR		0.837013	0.0839995		0.753013	0.0510505	0.599861	0.906165
15	23810334	cg20792895	MKRN3:TSS-DMR		0.780178	0.0314035		0.748774	0.0503756	0.597647	0.899901
15	23810378	cg05952543	MKRN3:TSS-DMR		0.867812	0.0297356		0.838076	0.0407481	0.715832	0.96032
15	23810664	cg03969797	MKRN3:TSS-DMR		0.634383	0.0845551		0.549828	0.0723032	0.332918	0.766737
15	23810843	cg00215587	MKRN3:TSS-DMR		0.720011	0.0162242		0.703787	0.0481288	0.5594	0.848173
15	23810849	cg13096454	MKRN3:TSS-DMR		0.853637	0.0493263		0.80431	0.0491462	0.656872	0.951749
15	23810861	cg11100640	MKRN3:TSS-DMR		0.800791	0.0491834		0.751608	0.0502919	0.600732	0.902484
15	23811205	cg23234999	MKRN3:TSS-DMR		0.827288	0.0316388		0.795649	0.0430616	0.666464	0.924833
15	23812334	cg07760796	MKRN3:TSS-DMR		0.80304	0.065152		0.737888	0.0477951	0.594503	0.881274
15	23892574	cg20747630	MAGEL2:TSS-DMR		0.62529	0.0289571		0.596333	0.0258768	0.518702	0.673963
15	23892656	cg04142555	MAGEL2:TSS-DMR		0.42904	-0.0178016		0.446842	0.0423194	0.319884	0.5738
15	23892770	cg14432018	MAGEL2:TSS-DMR		0.730937	0.0384711		0.692466	0.0436024	0.561658	0.823273
15	23893025	cg19961998	MAGEL2:TSS-DMR		0.505926	0.0106963		0.49523	0.0346309	0.391337	0.599122
15	23893030	cg22925508	MAGEL2:TSS-DMR		0.396527	-0.0142259		0.410753	0.0287239	0.324581	0.496925
15	23893040	cg18253764	MAGEL2:TSS-DMR		0.488188	0.00489961		0.483288	0.0294935	0.394807	0.571769
15	23893086	cg19147262	MAGEL2:TSS-DMR		0.616924	-0.0112861		0.628211	0.0247043	0.554098	0.702324
15	23893742	cg22872376	MAGEL2:TSS-DMR		0.516922	0.04459		0.472332	0.0415451	0.347697	0.596967
15	23893769	cg20871407	MAGEL2:TSS-DMR		0.651777	-0.0558882		0.707665	0.0331857	0.608108	0.807222
15	23931451	cg06743811	NDN:TSS-DMR		0.734223	0.00859651		0.725626	0.031276	0.631798	0.819454
15	23931940	cg24215869	NDN:TSS-DMR		0.401965	-0.0377544		0.43972	0.0278406	0.356198	0.523242
15	23932373	cg13828758	NDN:TSS-DMR		0.547409	-0.0499897		0.597399	0.0528751	0.438774	0.756024
15	23932397	cg22694067	NDN:TSS-DMR		0.347133	-0.11595		0.463083	0.0417572	0.337811	0.588354
15	23932412	cg26725891	NDN:TSS-DMR		0.47506	-0.122996		0.598057	0.0258732	0.520437	0.675676
15	23932620	cg18552939	NDN:TSS-DMR		0.241279	-0.112326		0.353605	0.0423109	0.226672	0.480538
15	23932626	cg19089045	NDN:TSS-DMR		0.179437	-0.134943		0.31438	0.0421211	0.188016	0.440743
15	23932758	cg01989224	NDN:TSS-DMR		0.593932	0.0558854		0.538047	0.0376429	0.425118	0.650975
15	25068564	cg22491305	SNRPN:alt-TSS-DMR		0.798886	0.0466369		0.752249	0.0343603	0.649168	0.85533
15	25068738	cg11265941	SNRPN:alt-TSS-DMR		0.598583	0.0029755		0.595607	0.0258214	0.518143	0.673072
15	25068757	cg24785225	SNRPN:alt-TSS-DMR		0.65631	-0.000963886		0.657274	0.0223363	0.590266	0.724283
15	25068763	cg10271763	SNRPN:alt-TSS-DMR		0.640002	0.0121771		0.627825	0.0253601	0.551744	0.703905
15	25068769	cg27304225	SNRPN:alt-TSS-DMR		0.654567	-0.0105635		0.66513	0.0492345	0.517427	0.812834
15	25068790	cg19803984	SNRPN:alt-TSS-DMR		0.575582	0.0421329		0.533449	0.0351356	0.428043	0.638856
15	25069376	cg26033681	SNRPN:alt-TSS-DMR		0.5316	0.124077		0.407524	0.062529	0.219937	0.595111
15	25093244	cg25978208	SNRPN:Int1-DMR1		0.676605	0.118538		0.558067	0.0432215	0.458403	0.687732
15	25093366	cg02171545	SNRPN:Int1-DMR1		0.566399	0.232199		0.3342	0.0377864	0.220841	0.447559
15	25093456	cg02305723	SNRPN:Int1-DMR1		0.579772	0.0875762		0.492196	0.0363137	0.383255	0.601137
15	25093521	cg22678136	SNRPN:Int1-DMR1		0.480418	0.171305		0.309113	0.0665966	0.169323	0.508903
15	25123287	cg27644292	SNRPN:Int1-DMR2		0.612215	0.0172287		0.594987	0.038314	0.480045	0.709929
15	25123381	cg08560373	SNRPN:Int1-DMR2		0.373216	0.0385044		0.334712	0.0576684	0.161707	0.507717
15	25123491	cg25657700	SNRPN:Int1-DMR2		0.684447	-0.0249864		0.709433	0.0422914	0.582559	0.836307
15	25123688	cg01786704	SNRPN:Int1-DMR2		0.264679	-0.171128		0.435806	0.0883846	0.170652	0.70096
15	25123731	cg21870668	SNRPN:Int1-DMR2		0.390767	-0.0581841		0.448951	0.0401843	0.328398	0.569504
15	25200113	cg16744228	SNURF:TSS-DMR		0.617523	-0.00848602		0.626009	0.0347499	0.521759	0.730259
15	25200133	cg17916021	SNURF:TSS-DMR		0.630645	-0.0172055		0.64785	0.0507945	0.495467	0.800234
15	25200145	cg04072648	SNURF:TSS-DMR		0.650438	-0.00492695		0.655365	0.0390003	0.538365	0.772366
15	25200202	cg17503663	SNURF:TSS-DMR		0.697787	-0.00854178		0.706328	0.027841	0.622805	0.789851
15	25200253	cg18506672	SNURF:TSS-DMR		0.612069	-0.00317385		0.615243	0.0439116	0.483508	0.746978
15	25200406	cg02125271	SNURF:TSS-DMR		0.742517	-0.0478604		0.790378	0.0265816	0.710633	0.870122
15	25201020	cg22159025	SNURF:TSS-DMR		0.594864	0.083613		0.511251	0.0438417	0.379726	0.642776
15	25201224	cg22555495	SNURF:TSS-DMR		0.658315	0.0301491		0.628166	0.04089	0.505496	0.750836
15	25201429	cg01614564	SNURF:TSS-DMR		0.683467	0.0183462		0.665121	0.0519364	0.509311	0.82093
15	25201732	cg13073261	SNURF:TSS-DMR		0.540387	-0.0162022		0.556589	0.0381484	0.442144	0.671034
15	99408636	cg19322380	IGF1R:Int2-DMR		0.82735	0.0547907		0.77256	0.0399244	0.652786	0.892333
15	99408804	cg21746425	IGF1R:Int2-DMR		0.624144	0.0613125		0.562831	0.0461543	0.424368	0.701294
15	99408958	cg12553689	IGF1R:Int2-DMR		0.757187	0.0253018		0.731885	0.0545778	0.568152	0.895619
15	99409194	cg07615383	IGF1R:Int2-DMR		0.566354	0.0356857		0.530668	0.0461746	0.392145	0.669192
15	99409360	cg00098799	IGF1R:Int2-DMR		0.670897	0.0387399		0.632157	0.0483552	0.487091	0.777223
15	99409411	cg13812291	IGF1R:Int2-DMR		0.790498	0.0265345		0.763964	0.0544623	0.600577	0.92735
15	99409506	cg03380198	IGF1R:Int2-DMR		0.685935	0.00925013		0.676685	0.0363579	0.567611	0.785759
16	3481970	cg02880119	ZNF597:3' DMR		0.893916	0.121164		0.772752	0.0815652	0.528056	1.01745
16	3482078	cg04027059	ZNF597:3' DMR		0.81703	0.0895877		0.727442	0.0350286	0.622356	0.832528
16	3482232	cg12472342	ZNF597:3' DMR		0.758821	0.0684243		0.690397	0.0324015	0.593192	0.787601
16	3493133	cg06410284	ZNF597:TSS-DMR		0.443232	-0.0747403		0.517972	0.0363616	0.408888	0.627057
16	3493336	cg09596866	ZNF597:TSS-DMR		0.13626	-0.361043		0.497303	0.0516839	0.342251	0.652354
16	3493423	cg10482201	ZNF597:TSS-DMR		0.237071	-0.383704		0.620775	0.0426913	0.492701	0.748849
16	3493428	cg24333473	ZNF597:TSS-DMR		0.120771	-0.317617		0.438387	0.0502301	0.287697	0.589078
16	3493440	cg03896694	ZNF597:TSS-DMR		0.208183	-0.351249		0.559431	0.0572136	0.387791	0.731072
16	3493534	cg27136643	ZNF597:TSS-DMR		0.364774	-0.270497		0.635271	0.0387599	0.518992	0.751551
16	3493614	cg03933495	ZNF597:TSS-DMR		0.207483	-0.238288		0.445772	0.0340385	0.343656	0.547887
16	3493641	cg24027317	ZNF597:TSS-DMR		0.285595	-0.288112		0.573707	0.0427765	0.445378	0.702037
16	3493681	cg27460547	ZNF597:TSS-DMR		0.328395	-0.226725		0.55512	0.0468033	0.41471	0.69553
16	3493687	cg01344564	ZNF597:TSS-DMR		0.304347	-0.239301		0.543648	0.0394116	0.425413	0.661883
16	3493815	cg26918062	ZNF597:TSS-DMR		0.278717	-0.227504		0.506221	0.0355949	0.399436	0.613006
16	3493997	cg14654875	ZNF597:TSS-DMR		0.354625	-0.243651		0.598277	0.0355363	0.491668	0.704886
16	3494006	cg14372630	ZNF597:TSS-DMR		0.248041	-0.206881		0.454923	0.0358388	0.347406	0.562439
16	3494094	cg10406676	ZNF597:TSS-DMR		0.376922	-0.168689		0.545611	0.028198	0.461017	0.630205
16	3494155	cg06121207	ZNF597:TSS-DMR		0.328222	-0.236206		0.564428	0.0298105	0.474996	0.653859
19	54040774	cg20646939	ZNF331:alt-TSS-DMR1		0.572705	-0.00748711		0.580192	0.0393357	0.462184	0.698199
19	54040813	cg06855497	ZNF331:alt-TSS-DMR1		0.66	0.0328098		0.62719	0.0323209	0.530228	0.724153
19	54040818	cg15576576	ZNF331:alt-TSS-DMR1		0.607855	-0.0198839		0.627739	0.0249193	0.552981	0.702497
19	54040836	cg16020674	ZNF331:alt-TSS-DMR1		0.644274	0.0496442		0.59463	0.0668717	0.394015	0.795245
19	54041163	cg22475353	ZNF331:alt-TSS-DMR1		0.443502	0.0126361		0.430866	0.0365879	0.321102	0.54063
19	54041251	cg27296330	ZNF331:alt-TSS-DMR1		0.47733	0.0503796		0.42695	0.0309526	0.334092	0.519808
19	54041308	cg15607708	ZNF331:alt-TSS-DMR1		0.416263	-0.00460962		0.420872	0.0447204	0.286711	0.555033
19	54041329	cg04522821	ZNF331:alt-TSS-DMR1		0.611712	0.00551992		0.606192	0.0469758	0.465265	0.74712
19	54041398	cg05338009	ZNF331:alt-TSS-DMR1		0.565751	0.0255155		0.540236	0.0480404	0.396114	0.684357
19	54041519	cg03643149	ZNF331:alt-TSS-DMR1		0.526001	-0.0208192		0.54682	0.0255859	0.470062	0.623577
19	54041847	cg14593306	ZNF331:alt-TSS-DMR1		0.630355	0.0422982		0.588057	0.0482499	0.443307	0.732806
19	54041856	cg03499639	ZNF331:alt-TSS-DMR1		0.639627	0.0211986		0.618428	0.0548572	0.453856	0.782999
19	54057208	cg06860848	ZNF331:alt-TSS-DMR2		0.614667	-0.0147958		0.629462	0.0339739	0.527541	0.731384
19	54057415	cg03113572	ZNF331:alt-TSS-DMR2		0.728811	0.0235798		0.705231	0.0438973	0.573539	0.836923
19	54057615	cg17223707	ZNF331:alt-TSS-DMR2		0.676355	-0.0119518		0.688307	0.0629909	0.499334	0.87728
19	54057671	cg10823956	ZNF331:alt-TSS-DMR2		0.564782	-0.0301926		0.594975	0.0443441	0.461943	0.728007
19	54057705	cg19696891	ZNF331:alt-TSS-DMR2		0.48875	-0.0166761		0.505426	0.0579972	0.331434	0.679417
19	54057794	cg03490784	ZNF331:alt-TSS-DMR2		0.624019	0.0249883		0.599031	0.0582576	0.424258	0.773804
19	54057916	cg12551529	ZNF331:alt-TSS-DMR2		0.612525	0.000391857		0.612133	0.0476008	0.46933	0.754935
19	54058085	cg20071427	ZNF331:alt-TSS-DMR2		0.67149	-0.0255297		0.697019	0.0594166	0.518769	0.875269
19	57348529	cg14904295	PEG3:TSS-DMR		0.411082	0.0955037		0.315579	0.0615821	0.130832	0.500325
19	57349204	cg15473155	PEG3:TSS-DMR		0.548777	-0.00487608		0.553653	0.0281683	0.469148	0.638158
19	57349679	cg19041006	PEG3:TSS-DMR		0.609855	0.000219557		0.609635	0.0384206	0.494373	0.724897
19	57349709	cg17663463	PEG3:TSS-DMR		0.748351	0.0304307		0.717921	0.0395522	0.599264	0.836577
19	57349815	cg19771589	PEG3:TSS-DMR		0.700213	0.0458722		0.654341	0.048141	0.509918	0.798764
19	57350004	cg02793099	PEG3:TSS-DMR		0.597049	0.0035687		0.59348	0.0427987	0.465084	0.721876
19	57350096	cg01656470	PEG3:TSS-DMR		0.711792	-0.00209926		0.713892	0.0427045	0.585778	0.842005
19	57350292	cg27519373	PEG3:TSS-DMR		0.761107	0.0254638		0.735644	0.0376686	0.622638	0.84865
19	57350313	cg18516833	PEG3:TSS-DMR		0.829754	0.00299275		0.826762	0.0279685	0.742856	0.910667
19	57350503	cg07310951	PEG3:TSS-DMR		0.675625	0.0482083		0.627417	0.0488564	0.480848	0.773987
19	57351322	cg02478023	PEG3:TSS-DMR		0.654203	0.0436527		0.610551	0.0366312	0.500657	0.720444
19	57351440	cg22354595	PEG3:TSS-DMR		0.704957	0.0314661		0.673491	0.0575941	0.500709	0.846273
19	57351642	cg19335327	PEG3:TSS-DMR		0.694218	0.0355018		0.658716	0.0576666	0.485717	0.831716
19	57351791	cg14849423	PEG3:TSS-DMR		0.76633	0.043117		0.723212	0.0544901	0.559742	0.886683
19	57352014	cg15777825	PEG3:TSS-DMR		0.560327	0.00809189		0.552235	0.0286813	0.466192	0.638279
19	57352021	cg12205903	PEG3:TSS-DMR		0.594672	0.00964533		0.585027	0.0376761	0.471999	0.698055
19	57352074	cg26349266	PEG3:TSS-DMR		0.692168	0.0181756		0.673992	0.0356961	0.566904	0.781081
19	57352134	cg02162069	PEG3:TSS-DMR		0.655076	0.0578374		0.597238	0.0438347	0.465734	0.728742
19	57352142	cg13960339	PEG3:TSS-DMR		0.698865	0.0104928		0.688372	0.0525504	0.530721	0.846024
19	57352176	cg13369939	PEG3:TSS-DMR		0.658315	-0.00406019		0.662375	0.0404095	0.541147	0.783604
19	57352185	cg20628335	PEG3:TSS-DMR		0.678433	0.0351561		0.643277	0.0486969	0.497186	0.789368
19	57352252	cg22294267	PEG3:TSS-DMR		0.715047	-0.00638431		0.721431	0.0371414	0.610007	0.832855
19	57352269	cg19098268	PEG3:TSS-DMR		0.697126	0.0401424		0.656983	0.0511217	0.503618	0.810348
19	57352465	cg24844423	PEG3:TSS-DMR		0.651437	-0.0248837		0.676321	0.0317351	0.581116	0.771526
19	57352519	cg15678121	PEG3:TSS-DMR		0.663215	0.00610776		0.657108	0.0226653	0.589112	0.725103
19	57352542	cg12032885	PEG3:TSS-DMR		0.474838	0.0326225		0.442215	0.037447	0.329874	0.554556
19	57352584	cg25458871	PEG3:TSS-DMR		0.654507	0.0355943		0.618913	0.0336713	0.517899	0.719927
19	57352657	cg18668753	PEG3:TSS-DMR		0.786248	0.0476561		0.738592	0.0358172	0.631141	0.846044
19	57352686	cg18706888	PEG3:TSS-DMR		0.682171	0.00613072		0.67604	0.0494261	0.527762	0.824318
19	57352729	cg01054891	PEG3:TSS-DMR		0.567147	0.009268		0.557879	0.0292301	0.470188	0.645569
19	57352746	cg18644235	PEG3:TSS-DMR		0.821503	0.0343333		0.78717	0.0268414	0.706646	0.867694
19	57352785	cg13374648	PEG3:TSS-DMR		0.66076	0.0107237		0.650036	0.0432442	0.520303	0.779769
19	57352807	cg26917367	PEG3:TSS-DMR		0.723339	-0.0207777		0.744117	0.0297719	0.654801	0.833433
19	57353128	cg22927979	PEG3:TSS-DMR		0.805603	0.106121		0.699482	0.0427618	0.571196	0.827767
20	30134929	cg25359645	MCTS2P:TSS-DMR		0.530796	0.011869		0.518927	0.0374837	0.406476	0.631378
20	30134973	cg24607140	MCTS2P:TSS-DMR		0.730281	0.0286729		0.701608	0.0368688	0.591002	0.812214
20	30135144	cg15815607	MCTS2P:TSS-DMR		0.67113	0.0149377		0.656192	0.0250046	0.581178	0.731206
20	30135149	cg25645178	MCTS2P:TSS-DMR		0.588252	-0.00405267		0.592304	0.0359181	0.48455	0.700059
20	30135158	cg17840843	MCTS2P:TSS-DMR		0.501138	0.00361803		0.49752	0.0426912	0.369446	0.625594
20	30135177	cg02146091	MCTS2P:TSS-DMR		0.572389	-0.0152476		0.587637	0.0455174	0.451085	0.724189
20	30135291	cg14175568	MCTS2P:TSS-DMR		0.55683	0.0459796		0.510851	0.0258416	0.433326	0.588375
20	30135362	cg20129782	MCTS2P:TSS-DMR		0.407228	0.0670088		0.340219	0.0482056	0.195602	0.484835
20	36148604	cg23757721	NNAT:TSS-DMR		0.793617	-0.00173302		0.79535	0.0447293	0.661162	0.929538
20	36148615	cg26083330	NNAT:TSS-DMR		0.786006	0.00617797		0.779828	0.0248494	0.70528	0.854376
20	36148620	cg22551578	NNAT:TSS-DMR		0.666622	0.0014239		0.665198	0.0355882	0.558433	0.771963
20	36148642	cg04489586	NNAT:TSS-DMR		0.689328	-0.00608278		0.69541	0.0422872	0.568549	0.822272
20	36148672	cg23605670	NNAT:TSS-DMR		0.608108	-0.0292104		0.637318	0.0366231	0.527449	0.747187
20	36148679	cg12862537	NNAT:TSS-DMR		0.659786	-0.0114888		0.671275	0.0470615	0.530091	0.81246
20	36148699	cg10981598	NNAT:TSS-DMR		0.644157	-0.00493022		0.649087	0.0328446	0.550553	0.747621
20	36148738	cg13790727	NNAT:TSS-DMR		0.802561	-0.00460747		0.807169	0.0314817	0.712724	0.901614
20	36148767	cg20783699	NNAT:TSS-DMR		0.76733	-0.0127214		0.780052	0.037243	0.668323	0.891781
20	36148775	cg25712981	NNAT:TSS-DMR		0.795537	-0.0160843		0.811622	0.0272647	0.729828	0.893416
20	36148779	cg03615235	NNAT:TSS-DMR		0.791202	-0.00311563		0.794318	0.0340059	0.6923	0.896336
20	36148791	cg17643025	NNAT:TSS-DMR		0.870115	-0.0111874		0.881303	0.0250297	0.806213	0.956392
20	36148798	cg24762053	NNAT:TSS-DMR		0.842568	-0.0018624		0.84443	0.0389012	0.727726	0.961133
20	36148803	cg14469070	NNAT:TSS-DMR		0.825884	0.0090202		0.816864	0.0258588	0.739288	0.89444
20	36148860	cg22298088	NNAT:TSS-DMR		0.863413	0.0219636		0.841449	0.0338128	0.740011	0.942888
20	36148928	cg22943498	NNAT:TSS-DMR		0.766408	-0.0034454		0.769854	0.0252125	0.694216	0.845491
20	36148954	cg14765818	NNAT:TSS-DMR		0.672386	0.0031016		0.669285	0.0305006	0.577783	0.760787
20	36148994	cg15473473	NNAT:TSS-DMR		0.691962	-0.0139368		0.705899	0.0363943	0.596716	0.815081
20	36149013	cg07156273	NNAT:TSS-DMR		0.803467	0.00420623		0.799261	0.0393738	0.68114	0.917383
20	36149022	cg01466133	NNAT:TSS-DMR		0.785741	-0.0116487		0.797389	0.0263095	0.718461	0.876318
20	36149081	cg24675557	NNAT:TSS-DMR		0.744765	-0.0239091		0.768674	0.0362688	0.659868	0.877481
20	36149112	cg20479660	NNAT:TSS-DMR		0.701295	-0.0144272		0.715722	0.0330005	0.616721	0.814724
20	36149119	cg22421148	NNAT:TSS-DMR		0.835893	0.0197034		0.816189	0.0329773	0.717257	0.915121
20	36149121	cg22510412	NNAT:TSS-DMR		0.831171	0.0128579		0.818313	0.0319065	0.722593	0.914033
20	36149185	cg03061677	NNAT:TSS-DMR		0.780014	0.014385		0.765629	0.032703	0.66752	0.863738
20	36149188	cg00576435	NNAT:TSS-DMR		0.723617	0.0138387		0.709778	0.042824	0.581306	0.83825
20	36149194	cg18433380	NNAT:TSS-DMR		0.712082	0.00616889		0.705913	0.0332831	0.606064	0.805762
20	36149231	cg16648571	NNAT:TSS-DMR		0.492249	0.00813938		0.48411	0.0437195	0.352951	0.615268
20	36149271	cg04810287	NNAT:TSS-DMR		0.702848	-0.00545773		0.708305	0.0252397	0.632586	0.784025
20	36149452	cg25962605	NNAT:TSS-DMR		0.673323	0.0242129		0.64911	0.0449703	0.514199	0.784021
20	36149455	cg21588305	NNAT:TSS-DMR		0.800248	-0.000938178		0.801186	0.0367496	0.690937	0.911435
20	36149656	cg13708635	NNAT:TSS-DMR		0.604659	0.0177056		0.586953	0.0308673	0.494351	0.679555
20	36149706	cg11174847	NNAT:TSS-DMR		0.634919	-0.00684474		0.641764	0.042163	0.515275	0.768253
20	36149750	cg23566503	NNAT:TSS-DMR		0.630779	0.0294947		0.601284	0.0424149	0.474039	0.728529
20	36150061	cg10642330	NNAT:TSS-DMR		0.554918	0.0234467		0.531472	0.0578993	0.357774	0.70517
20	42142417	cg22457903	L3MBTL1:alt-TSS-DMR		0.616352	0.0227987		0.593553	0.0422159	0.466906	0.720201
20	42142451	cg20091959	L3MBTL1:alt-TSS-DMR		0.643679	0.0151124		0.628567	0.0343322	0.52557	0.731563
20	42142484	cg17091610	L3MBTL1:alt-TSS-DMR		0.651423	0.0203812		0.631042	0.0401524	0.510585	0.751499
20	42142494	cg23626798	L3MBTL1:alt-TSS-DMR		0.669753	0.0123093		0.657444	0.0336931	0.556365	0.758523
20	42142559	cg15388309	L3MBTL1:alt-TSS-DMR		0.772449	0.033287		0.739162	0.0329519	0.640306	0.838018
20	42142596	cg16862791	L3MBTL1:alt-TSS-DMR		0.613233	0.0267314		0.586501	0.0205023	0.524995	0.648008
20	42142671	cg06446163	L3MBTL1:alt-TSS-DMR		0.713043	0.0642011		0.648842	0.04764	0.505922	0.791762
20	42142673	cg04984575	L3MBTL1:alt-TSS-DMR		0.681382	0.0398294		0.641553	0.0255727	0.564835	0.718271
20	42142699	cg02177317	L3MBTL1:alt-TSS-DMR		0.780848	-0.0105694		0.791418	0.021962	0.725531	0.857304
20	42142751	cg20529070	L3MBTL1:alt-TSS-DMR		0.713661	0.0264862		0.687175	0.03933	0.569185	0.805164
20	42142766	cg10360552	L3MBTL1:alt-TSS-DMR		0.672995	0.0242777		0.648718	0.0394148	0.530473	0.766962
20	42142784	cg18911945	L3MBTL1:alt-TSS-DMR		0.607382	0.0341171		0.573265	0.026903	0.492556	0.653974
20	42142847	cg01877937	L3MBTL1:alt-TSS-DMR		0.648477	0.0358078		0.612669	0.0286744	0.526646	0.698693
20	42142852	cg08633313	L3MBTL1:alt-TSS-DMR		0.637415	0.017762		0.619653	0.0240368	0.547543	0.691764
20	42142897	cg12699433	L3MBTL1:alt-TSS-DMR		0.61289	0.0104285		0.602461	0.0279037	0.51875	0.686172
20	42142947	cg11319028	L3MBTL1:alt-TSS-DMR		0.607037	0.0319823		0.575054	0.039219	0.457397	0.692711
20	42142995	cg22601123	L3MBTL1:alt-TSS-DMR		0.647767	0.0152366		0.63253	0.0392919	0.514655	0.750406
20	42143015	cg22330467	L3MBTL1:alt-TSS-DMR		0.645331	0.0614077		0.583923	0.0435927	0.453145	0.714701
20	42143045	cg14306330	L3MBTL1:alt-TSS-DMR		0.580391	0.0405942		0.539797	0.0516288	0.384911	0.694683
20	42143080	cg01071811	L3MBTL1:alt-TSS-DMR		0.743921	0.0436155		0.700305	0.0213488	0.636259	0.764351
20	42143096	cg02611863	L3MBTL1:alt-TSS-DMR		0.725322	0.0324113		0.692911	0.0244128	0.619672	0.766149
20	42143174	cg15330298	L3MBTL1:alt-TSS-DMR		0.741238	0.00014495		0.741093	0.0335313	0.640499	0.841687
20	42143211	cg20252111	L3MBTL1:alt-TSS-DMR		0.631696	-0.0204741		0.65217	0.0276109	0.569337	0.735003
20	42143399	cg15302378	L3MBTL1:alt-TSS-DMR		0.734174	-0.00113259		0.735306	0.0327062	0.637188	0.833425
20	42143489	cg09541000	L3MBTL1:alt-TSS-DMR		0.715996	0.0265189		0.689477	0.0295216	0.600912	0.778042
20	42143502	cg02472486	L3MBTL1:alt-TSS-DMR		0.592139	-0.00217834		0.594318	0.0398455	0.474781	0.713854
20	57414039	cg04132853	GNAS-NESP:TSS-DMR		0.757613	0.00703576		0.750577	0.0253403	0.674556	0.826598
20	57414059	cg25090051	GNAS-NESP:TSS-DMR		0.802013	-0.0149231		0.816936	0.049422	0.66867	0.965202
20	57414162	cg00732970	GNAS-NESP:TSS-DMR		0.57821	-0.00250213		0.580713	0.0361081	0.472388	0.689037
20	57414217	cg17696847	GNAS-NESP:TSS-DMR		0.641607	0.0469953		0.594611	0.0262494	0.515863	0.673359
20	57414274	cg23732978	GNAS-NESP:TSS-DMR		0.476514	-0.123971		0.600485	0.119744	0.241254	0.959716
20	57414351	cg20019489	GNAS-NESP:TSS-DMR		0.756733	0.0620896		0.694643	0.0598845	0.51499	0.874297
20	57414407	cg02274728	GNAS-NESP:TSS-DMR		0.642998	0.0289529		0.614045	0.0292288	0.526358	0.701731
20	57414529	cg12054318	GNAS-NESP:TSS-DMR		0.672432	0.0263677		0.646064	0.0364157	0.536817	0.755311
20	57414539	cg25268451	GNAS-NESP:TSS-DMR		0.681845	0.0193504		0.662495	0.0387508	0.546242	0.778747
20	57414578	cg11996914	GNAS-NESP:TSS-DMR		0.636599	0.0543534		0.582246	0.0204269	0.520965	0.643527
20	57414596	cg21330323	GNAS-NESP:TSS-DMR		0.599315	0.0131134		0.586201	0.0318687	0.490595	0.681808
20	57414745	cg17986444	GNAS-NESP:TSS-DMR		0.694858	0.00683787		0.68802	0.0347181	0.583865	0.792174
20	57414884	cg06163629	GNAS-NESP:TSS-DMR		0.573741	0.0175962		0.556145	0.0269723	0.475228	0.637062
20	57414960	cg14597908	GNAS-NESP:TSS-DMR		0.653992	0.0402209		0.613771	0.0489448	0.466937	0.760606
20	57415144	cg00765653	GNAS-NESP:TSS-DMR		0.599806	0.00445324		0.595353	0.0236022	0.524546	0.666159
20	57415177	cg14728235	GNAS-NESP:TSS-DMR		0.646515	0.00096978		0.645546	0.0269972	0.564554	0.726537
20	57415377	cg05558390	GNAS-NESP:TSS-DMR		0.408328	-0.00512076		0.413449	0.0259036	0.335738	0.49116
20	57415697	cg19296354	GNAS-NESP:TSS-DMR		0.655184	0.0425791		0.612605	0.048117	0.468254	0.756956
20	57415955	cg15725616	GNAS-NESP:TSS-DMR		0.709112	0.050191		0.658921	0.046528	0.519337	0.798505
20	57415978	cg18035618	GNAS-NESP:TSS-DMR		0.774342	0.0401415		0.734201	0.0601971	0.55361	0.914792
20	57416221	cg24975842	GNAS-NESP:TSS-DMR		0.568902	0.0142891		0.554613	0.0349147	0.449869	0.659357
20	57416506	cg18619398	GNAS-NESP:TSS-DMR		0.603823	0.0119001		0.591923	0.0538198	0.430463	0.753382
20	57416888	cg01355739	GNAS-NESP:TSS-DMR		0.737479	0.0327341		0.704745	0.0482359	0.560038	0.849453
20	57417233	cg20582984	GNAS-NESP:TSS-DMR		0.776713	0.0109691		0.765744	0.0408236	0.643273	0.888214
20	57418015	cg18949315	GNAS-NESP:TSS-DMR		0.517192	0.0408168		0.476375	0.0426205	0.348513	0.604237
20	57418373	cg02544157	GNAS-NESP:TSS-DMR		0.549599	0.101871		0.447728	0.0204102	0.386497	0.508958
20	57425979	cg18935491	GNAS-AS1:TSS-DMR		0.667093	0.0129988		0.654094	0.0214141	0.589852	0.718337
20	57425986	cg24203465	GNAS-AS1:TSS-DMR		0.624869	0.0072631		0.617605	0.0370194	0.506547	0.728664
20	57425994	cg26102503	GNAS-AS1:TSS-DMR		0.717443	0.0737037		0.643739	0.0336693	0.542731	0.744747
20	57426131	cg03344105	GNAS-AS1:TSS-DMR		0.664071	0.0261208		0.63795	0.0452265	0.50227	0.773629
20	57426138	cg14660776	GNAS-AS1:TSS-DMR		0.606284	0.0258717		0.580412	0.0408057	0.457995	0.702829
20	57426215	cg19592829	GNAS-AS1:TSS-DMR		0.716287	0.00937289		0.706914	0.0226233	0.639044	0.774784
20	57426264	cg09123158	GNAS-AS1:TSS-DMR		0.83667	-0.00599045		0.842661	0.0363488	0.733614	0.951707
20	57426274	cg19140375	GNAS-AS1:TSS-DMR		0.518727	0.115747		0.40298	0.0432041	0.273368	0.532592
20	57426322	cg11669839	GNAS-AS1:TSS-DMR		0.562744	0.0320581		0.530686	0.0289651	0.443791	0.617582
20	57426368	cg17841572	GNAS-AS1:TSS-DMR		0.648547	0.0475821		0.600965	0.0377721	0.487649	0.714281
20	57426374	cg25229306	GNAS-AS1:TSS-DMR		0.70783	0.0326334		0.675197	0.0474968	0.532707	0.817687
20	57426383	cg14482474	GNAS-AS1:TSS-DMR		0.713165	0.0252564		0.687909	0.0488177	0.541456	0.834362
20	57426391	cg08166863	GNAS-AS1:TSS-DMR		0.694336	0.00571279		0.688623	0.0328384	0.590108	0.787139
20	57426395	cg11285807	GNAS-AS1:TSS-DMR		0.635775	-0.0150227		0.650798	0.0514996	0.496299	0.805297
20	57426420	cg06200857	GNAS-AS1:TSS-DMR		0.668678	0.0129394		0.655739	0.041758	0.530465	0.781013
20	57426425	cg08091561	GNAS-AS1:TSS-DMR		0.687302	0.0244575		0.662844	0.0482873	0.517982	0.807706
20	57426538	cg22860367	GNAS-AS1:TSS-DMR		0.64275	0.062058		0.580692	0.0428835	0.452041	0.709342
20	57426545	cg07947033	GNAS-AS1:TSS-DMR		0.656195	0.0104292		0.645766	0.0270906	0.564495	0.727038
20	57426570	cg06693667	GNAS-AS1:TSS-DMR		0.659438	0.0239985		0.63544	0.0406602	0.513459	0.75742
20	57426743	cg04677683	GNAS-AS1:TSS-DMR		0.709628	0.0218051		0.687823	0.0589611	0.51094	0.864707
20	57426749	cg15160445	GNAS-AS1:TSS-DMR		0.707457	0.0184987		0.688959	0.044104	0.556646	0.821271
20	57426757	cg25326570	GNAS-AS1:TSS-DMR		0.723628	0.0609419		0.662687	0.0454032	0.526477	0.798896
20	57426759	cg23249369	GNAS-AS1:TSS-DMR		0.727855	0.0120575		0.715797	0.0362138	0.607156	0.824439
20	57426789	cg01715551	GNAS-AS1:TSS-DMR		0.667256	0.0439846		0.623271	0.0441092	0.490944	0.755598
20	57426801	cg14176797	GNAS-AS1:TSS-DMR		0.723167	0.039012		0.684155	0.0543797	0.521016	0.847294
20	57426835	cg04457481	GNAS-AS1:TSS-DMR		0.699071	0.0423464		0.656725	0.0402414	0.536	0.777449
20	57426858	cg27262796	GNAS-AS1:TSS-DMR		0.655882	-0.00658533		0.662468	0.0305142	0.570925	0.75401
20	57426931	cg21938532	GNAS-AS1:TSS-DMR		0.644411	-0.00592569		0.650337	0.0277346	0.567133	0.733541
20	57426950	cg22989942	GNAS-AS1:TSS-DMR		0.655558	0.00631936		0.649238	0.0459397	0.511419	0.787057
20	57426979	cg18224653	GNAS-AS1:TSS-DMR		0.61385	0.00164351		0.612206	0.0425501	0.484556	0.739857
20	57427010	cg14309385	GNAS-AS1:TSS-DMR		0.639136	0.00887583		0.630261	0.0331391	0.530843	0.729678
20	57427017	cg05309239	GNAS-AS1:TSS-DMR		0.638825	0.000640282		0.638185	0.0429511	0.509332	0.767038
20	57427030	cg12573482	GNAS-AS1:TSS-DMR		0.655599	0.0374095		0.618189	0.0501022	0.467882	0.768496
20	57427103	cg06324048	GNAS-AS1:TSS-DMR		0.711484	0.0471247		0.664359	0.0464446	0.525025	0.803693
20	57427146	cg24617313	GNAS-AS1:TSS-DMR		0.591259	-0.00174496		0.593004	0.0285901	0.507234	0.678775
20	57427170	cg03908391	GNAS-AS1:TSS-DMR		0.693782	0.00806397		0.685718	0.0318902	0.590048	0.781389
20	57427173	cg22290117	GNAS-AS1:TSS-DMR		0.766795	0.0475091		0.719286	0.04441	0.586056	0.852516
20	57427210	cg26496204	GNAS-AS1:TSS-DMR		0.709624	0.0206369		0.688987	0.0495441	0.540355	0.83762
20	57427274	cg03010274	GNAS-AS1:TSS-DMR		0.613637	0.0342279		0.579409	0.0370099	0.468379	0.690439
20	57427412	cg25652859	GNAS-AS1:TSS-DMR		0.55359	0.0423889		0.511201	0.0520441	0.355069	0.667334
20	57427426	cg12321149	GNAS-AS1:TSS-DMR		0.597333	0.0271905		0.570143	0.0417572	0.444871	0.695414
20	57427443	cg06065549	GNAS-AS1:TSS-DMR		0.580138	-0.00305644		0.583195	0.0502721	0.432379	0.734011
20	57427472	cg07105596	GNAS-AS1:TSS-DMR		0.614472	0.0274943		0.586978	0.0400595	0.466799	0.707156
20	57427483	cg27304369	GNAS-AS1:TSS-DMR		0.647282	0.0171435		0.630139	0.0516959	0.475051	0.785226
20	57427493	cg26811638	GNAS-AS1:TSS-DMR		0.506631	-0.00462736		0.511258	0.0478987	0.367562	0.654954
20	57427495	cg26534489	GNAS-AS1:TSS-DMR		0.55323	-0.0229872		0.576217	0.0490781	0.428983	0.723452
20	57427503	cg08587534	GNAS-AS1:TSS-DMR		0.558268	-0.010575		0.568843	0.0349204	0.464082	0.673605
20	57427556	cg14564778	GNAS-AS1:TSS-DMR		0.554711	0.00453599		0.550175	0.043218	0.420521	0.679829
20	57427642	cg01817393	GNAS-AS1:TSS-DMR		0.426037	-0.00902199		0.435059	0.0505791	0.283322	0.586797
20	57427650	cg02890368	GNAS-AS1:TSS-DMR		0.477202	0.0942508		0.382951	0.0452269	0.24727	0.518632
20	57427713	cg04257105	GNAS-AS1:TSS-DMR		0.525016	0.00626		0.518756	0.0401129	0.398417	0.639095
20	57427730	cg20528838	GNAS-AS1:TSS-DMR		0.389753	0.00256232		0.38719	0.0312897	0.293321	0.481059
20	57427738	cg27661264	GNAS-AS1:TSS-DMR		0.481509	0.0181634		0.463345	0.0459233	0.325575	0.601115
20	57427762	cg19589727	GNAS-AS1:TSS-DMR		0.497335	0.00154735		0.495787	0.047903	0.352078	0.639496
20	57427821	cg10302550	GNAS-AS1:TSS-DMR		0.562091	0.00818602		0.553905	0.0325715	0.45619	0.651619
20	57427830	cg17414107	GNAS-AS1:TSS-DMR		0.726631	0.0323694		0.694262	0.0555823	0.527515	0.861009
20	57427942	cg00943909	GNAS-AS1:TSS-DMR		0.56619	0.0026674		0.563523	0.0453331	0.427524	0.699522
20	57427973	cg19640589	GNAS-AS1:TSS-DMR		0.475061	0.0380768		0.436984	0.03788	0.323344	0.550624
20	57427977	cg09393900	GNAS-AS1:TSS-DMR		0.579213	0.00638655		0.572827	0.0202903	0.511956	0.633698
20	57429025	cg20554943	GNAS-XL:Ex1-DMR		0.596342	0.0239306		0.572412	0.0494848	0.423957	0.720866
20	57429858	cg07284407	GNAS-XL:Ex1-DMR		0.648574	0.0239039		0.62467	0.0618201	0.43921	0.810131
20	57430133	cg26711395	GNAS-XL:Ex1-DMR		0.662106	-0.011199		0.673306	0.0440615	0.541121	0.80549
20	57430313	cg21625881	GNAS-XL:Ex1-DMR		0.773791	0.0397461		0.734045	0.0511502	0.580594	0.887495
20	57430663	cg14203179	GNAS-XL:Ex1-DMR		0.58941	0.0155628		0.573847	0.0278972	0.490156	0.657539
20	57431202	cg09437522	GNAS-XL:Ex1-DMR		0.465766	0.0770214		0.388744	0.071824	0.173272	0.604216
20	57431303	cg10468484	GNAS-XL:Ex1-DMR		0.390779	0.0460712		0.344708	0.0843966	0.0915181	0.597898
20	57463265	cg22741626	GNAS A/B:TSS-DMR		0.659395	-0.00416224		0.663558	0.0413509	0.539505	0.78761
20	57463270	cg18997188	GNAS A/B:TSS-DMR		0.648108	0.0232855		0.624822	0.0365366	0.515212	0.734432
20	57463325	cg20213508	GNAS A/B:TSS-DMR		0.680738	0.00265001		0.678088	0.0406987	0.555992	0.800184
20	57463330	cg26791489	GNAS A/B:TSS-DMR		0.559947	-0.0435888		0.603536	0.0302595	0.512757	0.694314
20	57463355	cg04779428	GNAS A/B:TSS-DMR		0.723852	0.0557402		0.668112	0.0387601	0.551832	0.784392
20	57463357	cg04019914	GNAS A/B:TSS-DMR		0.698799	0.0073871		0.691412	0.0446697	0.557403	0.825422
20	57463397	cg11357538	GNAS A/B:TSS-DMR		0.649667	0.00947297		0.640194	0.0357843	0.532841	0.747547
20	57463455	cg20008140	GNAS A/B:TSS-DMR		0.561694	-0.00719699		0.568891	0.0357577	0.461618	0.676164
20	57463503	cg11480267	GNAS A/B:TSS-DMR		0.64729	-0.0330279		0.680318	0.0843627	0.42723	0.933406
20	57463527	cg10011623	GNAS A/B:TSS-DMR		0.810244	0.0245641		0.78568	0.0280453	0.701544	0.869816
20	57463530	cg01748573	GNAS A/B:TSS-DMR		0.590097	0.0175762		0.572521	0.0445694	0.438813	0.706229
20	57463572	cg17334845	GNAS A/B:TSS-DMR		0.567474	0.014938		0.552536	0.0437654	0.421239	0.683832
20	57463615	cg26767990	GNAS A/B:TSS-DMR		0.576049	0.00253033		0.573519	0.023451	0.503166	0.643872
20	57463653	cg17652507	GNAS A/B:TSS-DMR		0.606755	0.00209265		0.604662	0.0491484	0.457217	0.752108
20	57463658	cg22407822	GNAS A/B:TSS-DMR		0.559477	-0.0136548		0.573132	0.149538	0.124517	1.02175
20	57463711	cg07341934	GNAS A/B:TSS-DMR		0.697598	0.0225057		0.675092	0.059764	0.4958	0.854384
20	57463713	cg02107718	GNAS A/B:TSS-DMR		0.700328	0.0553017		0.645027	0.0558124	0.477589	0.812464
20	57463725	cg23496597	GNAS A/B:TSS-DMR		0.614623	0.00725763		0.607365	0.0387596	0.491087	0.723644
20	57463763	cg25308079	GNAS A/B:TSS-DMR		0.688723	0.0399912		0.648732	0.0289543	0.561869	0.735595
20	57463775	cg09772382	GNAS A/B:TSS-DMR		0.64911	-0.00747108		0.656581	0.0383561	0.541512	0.771649
20	57463783	cg15222215	GNAS A/B:TSS-DMR		0.629904	-0.00391924		0.633823	0.0500717	0.483608	0.784038
20	57463787	cg14263118	GNAS A/B:TSS-DMR		0.627855	0.000338157		0.627517	0.0454705	0.491106	0.763929
20	57463900	cg11244758	GNAS A/B:TSS-DMR		0.630476	0.00509398		0.625382	0.0591317	0.447987	0.802777
20	57463906	cg05926269	GNAS A/B:TSS-DMR		0.784351	0.0235164		0.760835	0.0308088	0.668408	0.853261
20	57463925	cg03821543	GNAS A/B:TSS-DMR		0.594943	0.0288408		0.566102	0.0394005	0.4479	0.684303
20	57463974	cg01538522	GNAS A/B:TSS-DMR		0.570742	0.0414999		0.529242	0.0558851	0.361587	0.696897
20	57463984	cg00267746	GNAS A/B:TSS-DMR		0.554289	0.0324782		0.52181	0.0334228	0.421542	0.622079
20	57464000	cg03837903	GNAS A/B:TSS-DMR		0.625726	-0.00470743		0.630433	0.0660003	0.432433	0.828434
20	57464002	cg23159236	GNAS A/B:TSS-DMR		0.457253	-0.0268788		0.484132	0.0600431	0.304002	0.664261
20	57464129	cg22798925	GNAS A/B:TSS-DMR		0.598652	0.0193784		0.579273	0.0433205	0.449312	0.709235
20	57464571	cg20126878	GNAS A/B:TSS-DMR		0.652738	0.0478496		0.604888	0.053961	0.443005	0.766771
20	57464742	cg27027803	GNAS A/B:TSS-DMR		0.750171	0.0452463		0.704925	0.0636302	0.514034	0.895815
20	57464970	cg08997444	GNAS A/B:TSS-DMR		0.790252	0.0522631		0.737989	0.0430125	0.608952	0.867027
20	57464973	cg22639787	GNAS A/B:TSS-DMR		0.741687	0.0247861		0.716901	0.0385137	0.60136	0.832442
20	57465123	cg05960039	GNAS A/B:TSS-DMR		0.437285	0.029324		0.407961	0.0171345	0.356557	0.459364
20	57465125	cg09604333	GNAS A/B:TSS-DMR		0.523198	0.0358455		0.487353	0.0346675	0.38335	0.591355
20	57465132	cg06047881	GNAS A/B:TSS-DMR		0.629537	0.0328704		0.596667	0.0461429	0.458238	0.735096
20	57465139	cg20018057	GNAS A/B:TSS-DMR		0.634204	0.0605236		0.57368	0.0482001	0.42908	0.718281
20	57465175	cg10748817	GNAS A/B:TSS-DMR		0.592303	0.00211617		0.590187	0.0386175	0.474334	0.706039
21	40757691	cg00606841	WRB:alt-TSS-DMR		0.673936	0.0259264		0.64801	0.0544405	0.484688	0.811331
21	40757899	cg26710963	WRB:alt-TSS-DMR		0.590804	-0.00809277		0.598897	0.0376637	0.485906	0.711888
21	40758208	cg09916765	WRB:alt-TSS-DMR		0.367282	-0.0174811		0.384763	0.0433119	0.254827	0.514699
22	42077939	cg06781532	SNU13:alt-TSS-DMR		0.638834	-0.00521529		0.644049	0.0285569	0.558379	0.72972
22	42078217	cg18152773	SNU13:alt-TSS-DMR		0.580155	0.0081156		0.572039	0.0532059	0.412422	0.731657
22	42078330	cg05871614	SNU13:alt-TSS-DMR		0.688015	0.0354679		0.652547	0.0477888	0.509181	0.795914
22	42078365	cg22083753	SNU13:alt-TSS-DMR		0.636578	0.0251389		0.611439	0.0429262	0.48266	0.740218
22	42078388	cg15284719	SNU13:alt-TSS-DMR		0.617719	0.0208466		0.596872	0.062161	0.410389	0.783355
22	42078567	cg08686092	SNU13:alt-TSS-DMR		0.587126	-0.00497269		0.592099	0.0402774	0.471267	0.712931
22	42078707	cg11677105	SNU13:alt-TSS-DMR		0.532513	0.0834802		0.449033	0.0637751	0.257708	0.640359
β values of the patient are written in red and blue when they are above Average +3 SD and below Average −3 SD of the control subjects, respectively.
Δβ values of the patient, obtained from subtraction of Average β values of control subjects from β value of the patient, are higlighted corresponding to those in supplementary
figure 3.
