# Supplementary material
Source: HighWire-hosted journal article supplement (https://jmg.bmj.com/content/58/6/427)
Supplement: inline-supplementary-material-9 [file inline-supplementary-material-9.pdf]

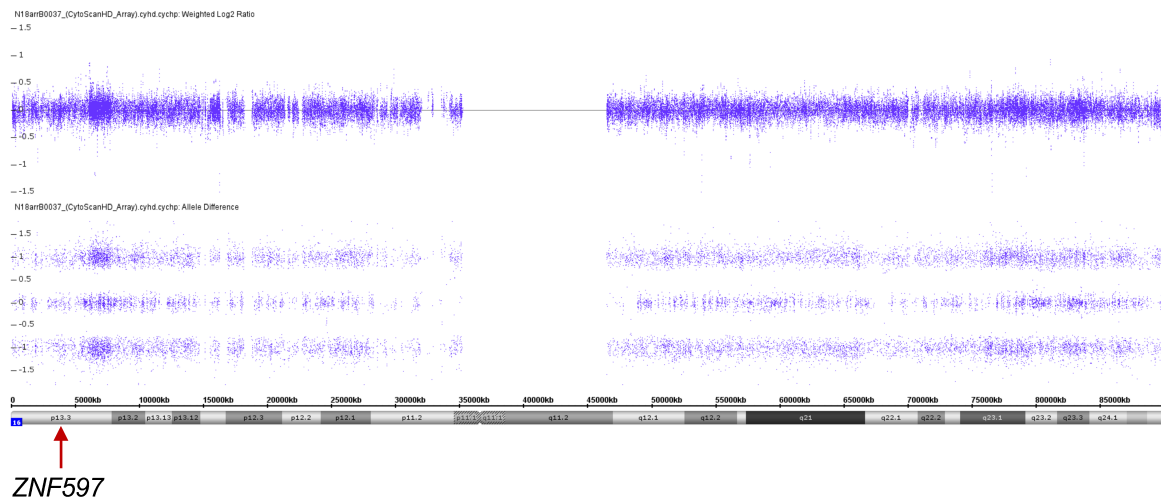

**Supplementary Figure 5.** Single nucleotide polymorphism array analysis of the patient for chromosome 16. The *ZNF597* locus is depicted. Neither copy number variations nor loss of heterozygosity regions were detected throughout the genome including chromosome 16.
